# Supplementary material for: Vulnerabilities in the Tau Network and the Role of Ultrasensitive Points in Tau Pathophysiology
Source: PLoS Comput Biol. 2010 Nov 11;6(11):e1000997. doi: 10.1371/journal.pcbi.1000997 (PMC2978700; doi:10.1371/journal.pcbi.1000997)
Supplement: Dataset S1 — Optimization results. (8.36 MB XLSX) [file pcbi.1000997.s012.xlsx]

## Sheet: Results_Stage1
Table S3. Stage 1 optimization results.
	Run1	Run2	Run3	Run4	Run5	Run6	Run7	Run8	Run9	Run10	Run11	Run12	Run13	Run14	Run15	Run16	Run17	Run18	Run19	Run20	Run21	Run22	Run23	Run24	Run25	Run26	Run27	Run28	Run29	Run30	Run31	Run32	Run33	Run34	Run35	Run36	Run37	Run38	Run39	Run40	Run41	Run42	Run43	Run44	Run45	Run46	Run47	Run48	Run49
k2	0.0839497	0.0950604	0.335751	0.0482591	0.0489333	0.150696	0.214001	0.113013	0.0584556	0.0343809	0.92136	0.887657	0.480311	0.174451	0.100766	0.518929	0.574138	0.899191	0.839446	0.463554	0.324419	0.482406	0.638831	0.0505234	0.190011	0.136603	0.540873	0.584113	0.0927916	0.164164	0.0335106	0.247015	0.144577	0.0423255	0.181511	0.59835	0.281572	0.396246	0.114431	0.0445711	0.157833	0.890518	0.326143	0.459458	0.0710141	0.409523	0.99711	0.24938	0.544789
k3	27.5668	10.2879	12.6056	20.3447	37.1615	29.4151	28.4447	17.0867	21.9973	39.8954	18.5547	35.4792	28.0983	18.7292	11.8963	13.2441	14.7024	9.30405	10.3862	14.3569	16.0571	24.1956	28.0585	7.94763	8.72477	12.3927	23.4613	15.6553	15.131	16.7369	7.77752	8.11531	29.4805	8.29496	9.11874	38.0105	15.7742	11.8025	11.9497	29.1162	22.2023	31.0135	16.2249	11.2321	14.5526	11.6171	24.942	14.6774	7.54195
k4	1.28764	6.70718	5.01223	1.06412	1.02968	2.08194	4.76196	2.76898	2.01634	9.81321	1.28944	2.04327	7.6377	1.46273	3.24404	2.50524	1.0055	1.25802	2.18075	1.57119	2.47193	8.58218	2.07153	4.76815	6.90697	1.53072	3.41326	1.80596	1.77749	4.00318	2.41904	1.4344	6.64214	9.17792	2.93774	9.21877	7.44304	5.63978	1.67859	1.76909	2.2841	4.29323	4.64125	3.08998	1.4579	2.91816	2.04101	2.19184	1.03125
k5	7.99621	11.407	4.04163	19.0086	4.28521	3.52845	2.68914	9.37975	7.13873	11.3358	6.47627	9.88822	7.69432	3.37384	19.4722	2.69522	2.38325	2.98883	8.52138	7.56494	8.12166	18.1216	2.50736	2.2684	7.53969	8.85812	5.62373	2.55826	6.07294	3.80526	3.97179	11.2095	4.43025	17.9446	9.253	3.80345	4.83935	6.54631	14.3425	11.8215	10.2832	13.0489	5.81679	17.9819	6.60395	9.08729	11.1069	6.56981	8.75091
k6	0.227887	0.89931	0.198535	0.0391777	0.326346	0.0347945	0.693429	0.145941	0.0840163	0.912257	0.165006	0.295683	0.962727	0.211242	0.0605203	0.287537	0.08992	0.0335393	0.0744053	0.280182	0.0392386	0.192941	0.0591105	0.0465777	0.275206	0.22881	0.0852398	0.085317	0.100379	0.12398	0.655745	0.154826	0.431849	0.908214	0.119477	0.113056	0.18307	0.506029	0.032025	0.206971	0.188742	0.914462	0.0810855	0.677302	0.129418	0.0963667	0.413427	0.441341	0.812744
k7	21.9114	48.772	13.1359	25.8754	48.5655	49.9233	10.5049	23.1825	15.1123	30.4008	7.85818	10.517	5.84865	36.3122	5.87288	39.5576	6.62873	12.2959	35.732	21.1485	13.6115	7.18061	28.2132	7.25714	36.2975	20.0529	16.3338	15.2176	8.86056	15.4196	15.4448	35.9791	18.6074	43.3516	21.2023	48.8425	30.2539	16.301	21.9023	16.423	22.6533	21.6747	36.0647	16.7234	13.2595	32.0273	43.2486	28.4731	45.0714
k8	0.8714	3.99621	0.211853	0.178068	0.795413	0.186839	5.6169	9.99222	1.93782	1.63672	0.579375	1.96582	19.9677	0.141849	3.72472	0.583106	0.621278	0.127557	0.586436	10.9161	4.70876	4.79578	4.98855	4.62804	9.30877	0.105858	4.84244	0.568626	1.58573	1.28126	1.69596	0.367521	0.247234	0.207384	0.400966	19.2479	2.72355	2.56601	6.0482	3.08717	0.946052	7.08929	3.20765	19.8807	8.70421	0.832334	0.268106	0.177317	0.128473
k9	5.76026	1.00001	4.89011	1.42087	8.26243	2.83142	4.14318	2.17913	4.07638	16	8.15671	1.99423	8.26509	2.69636	15.2121	3.14962	6.23974	1.10421	7.25002	1.02156	3.53655	8.22934	2.0769	5.71842	1.87143	14.6107	2.16382	14.2773	7.77355	1.99821	1.60002	3.50383	4.2506	15.7435	4.57786	15.4173	2.55858	5.4991	7.29556	1.59763	7.16155	2.74853	3.68318	2.43689	5.85415	9.6946	13.0152	6.42863	1.04101
k10	7.11868	42.2116	13.0545	19.5969	71.7051	60.5851	66.3778	69.7269	18.6262	59.5326	17.8284	15.8928	74.2883	73.678	71.5258	20.3151	14.4533	4.72062	4	31.9927	24.8318	30.1996	40.9978	67.504	74.8184	39.8027	19.4994	10.7036	19.1092	21.5038	18.4069	5.2876	49.4312	71.014	28.5465	38.4262	10.7412	13.0986	29.1712	44.8208	16.3094	14.9839	60.1906	46.7796	60.523	28.9718	30.9768	53.0813	69.3396
k12	9.63377	73.2341	28.1744	30.2276	10.8376	33.0563	33.3166	15.3276	46.647	4.92381	43.0195	12.7097	25.485	22.7897	71.8669	42.8464	29.4098	4.88404	74.6795	50.5923	22.9057	46.9685	5.60155	17.8391	18.0879	14.4228	25.0202	4.41304	19.0621	14.838	33.5651	16.7503	64.9988	69.0152	21.1897	73.4812	24.0052	21.2041	6.01696	13.4507	10.4112	20.3603	18.1055	8.75644	52.8213	64.9392	27.7219	11.0763	16.2726
k13	0.163388	0.964698	0.226795	15.6092	0.52919	0.540753	6.58415	0.86754	0.307387	94.3951	7.42157	1.59504	1.28448	0.304624	1.05956	1.42408	1.83395	0.12769	0.123532	0.218931	0.134091	8.4533	0.104092	0.161562	1.28997	0.2549	0.79767	0.128006	0.346453	0.792184	0.125191	0.154616	2.52762	18.0361	0.62974	2.01284	0.190672	0.127539	0.679709	2.15027	1.28812	0.434035	0.579809	0.403878	6.53805	4.18366	1.50572	0.32534	98.2061
k14	1.54089	0.133375	3.56991	5.12064	68.4665	0.253756	1.55553	7.39196	0.153416	8.8158	0.379138	0.854899	81.9291	0.105032	21.6331	0.485826	0.109039	0.528851	0.904167	13.4569	1.27935	5.59297	0.61972	5.40512	0.407542	0.672339	1.60862	3.50029	8.71311	2.40209	2.7008	0.129761	60.489	0.144835	11.4083	18.7887	8.11036	5.29366	1.98577	21.5171	4.4211	0.519743	3.28224	14.5014	65.4637	22.437	97.7795	0.39682	0.362809
k15	9.22043	8.55456	4.4585	72.0472	68.2177	2.6559	39.0074	1.91175	8.99184	52.5187	16.0987	12.088	18.8171	1.09056	13.608	4.96224	0.904777	2.65934	7.28773	59.5541	3.72847	2.216	5.07979	1.64168	1.07275	0.588369	1.76985	25.832	5.11689	19.3006	67.8527	4.01505	40.225	1.51646	19.3214	13.2807	23.8657	11.1614	1.89767	27.9848	26.3241	5.29963	9.74534	5.60359	23.4026	48.1713	30.9878	0.64639	1.23897
k16	50.6616	50.7478	31.7939	60.3564	46.7559	61.8018	34.1859	24.0827	50.0526	46.9173	73.2734	30.2656	21.4417	72.2897	66.0446	30.0187	34.7445	67.286	50.203	28.997	61.0159	38.6872	23.3107	50.2141	20.0628	51.3986	51.1448	26.9891	30.1904	58.4814	51.9292	29.5604	42.9104	27.6868	38.396	88.3172	35.7294	39.7622	23.6031	41.1537	52.2082	87.6564	32.407	23.3464	24.6989	51.5785	48.8059	37.2358	20.9748
k17	0.202066	0.133316	0.295155	0.0763396	0.381226	0.430688	0.0535092	0.332311	0.0678013	0.123887	0.0718041	0.0596549	0.283858	0.953899	0.67335	0.179982	0.388341	0.348996	0.127371	0.0915101	0.427384	0.47536	0.135438	0.694518	0.264289	0.714548	0.516837	0.0707888	0.341396	0.167617	0.0517547	0.0589742	0.425556	0.335013	0.243136	0.897926	0.178733	0.264821	0.241302	0.295901	0.132856	0.391705	0.192875	0.277564	0.297021	0.278138	0.599662	0.50309	0.203708
k18	3.94047	4.85773	2.77836	8.83458	1.33984	1.32607	4.92877	6.09403	6.06149	4.9744	1.25955	1.19128	9.35007	3.04109	1.69508	5.77273	1.03796	3.72657	7.0298	4.75697	4.78894	2.98776	1.48696	7.40751	1.03122	8.40676	3.11226	1.90621	2.78316	6.00757	5.31638	3.86281	1.30496	8.83174	1.90752	2.45886	4.75224	2.05562	1	2.39067	5.76337	9.73987	3.2604	5.96089	8.06802	2.11289	3.35237	5.31106	4.50017
k19	8.05215	100	2.20816	2.1579	0.115615	7.88173	12.0974	23.3704	0.885019	7.25734	1.76082	0.173505	0.174276	8.51031	3.34133	0.486615	2.77515	0.964288	28.0233	14.658	12.7649	4.29519	0.412392	0.122261	0.233295	0.102524	10.9204	0.285319	2.40479	0.574409	2.4415	24.7513	1.76633	56.9948	17.8246	9.27405	88.0763	1.05684	5.64842	0.462486	9.60471	0.557061	8.34094	0.182968	0.690478	0.891092	0.777578	1.24038	0.130049
k20	19.7698	56.2613	37.0448	64.0899	31.9827	69.9814	62.9634	59.9107	29.6226	15.1968	31.2421	14.8864	66.2574	38.958	42.3689	24.4836	14.9913	23.2576	19.1656	48.4608	32.4407	20.7798	32.5486	50.5754	21.6692	36.0209	25.3913	14.9929	31.706	23.3565	69.9925	20.9903	43.8152	70.004	22.48	58.0616	45.6579	41.9113	71.0893	53.6876	35.0809	22.0518	37.9112	14	17.3744	56.5505	28.7524	29.1358	14.6829
k21	7.24865	30.5367	88.791	11.0621	0.117405	1.53965	92.0405	1.8524	3.99383	13.6689	25.457	1.58353	22.0617	0.311184	22.8911	2.58552	51.89	1.42352	3.77672	0.194988	12.591	2.62201	39.0484	3.12351	0.200524	1.66484	48.6123	51.5819	1.45491	14.8004	8.47173	0.676038	11.8742	64.5435	0.235435	1.60615	11.6693	8.2885	0.27367	26.4159	1.93498	20.1659	23.8424	0.318124	0.725944	2.60808	42.1185	0.872726	25.5713
k22	0.0267603	0.364485	0.236534	0.186272	0.754934	0.102522	0.163145	0.0163329	0.0268221	0.99801	0.0615678	0.108878	0.201464	0.234231	0.033655	0.787478	0.0216139	0.984124	0.997758	0.199951	0.035992	0.231706	0.0291624	0.17143	0.124259	0.219787	0.0825819	0.672507	0.458444	0.0316209	0.0442132	0.01397	0.599931	0.0178325	0.281927	0.9634	0.202176	0.28459	0.206554	0.794982	0.335244	0.811391	0.072092	0.0195998	0.193608	0.491711	0.626151	0.0499221	0.850974
k23	2.15015	1.17744	1.782	1.06074	2.14614	1.39283	0.776557	4.98229	0.477089	0.544241	0.548252	0.630709	5	4.98501	2.14382	1.6773	2.04212	0.394624	0.254691	0.755766	1.67627	1.41734	1.77416	3.17003	5	3.65695	1.12075	0.926452	3.99087	0.781116	1.07502	0.346241	2.93817	4.78551	0.958867	2.19517	1.09662	1.87558	1.70089	1.10248	0.391254	1.42183	1.72981	1.64575	4.45375	1.60241	4.35868	3.06913	1.48604
k24	0.212593	0.0489397	0.0358181	0.043147	0.0421463	0.00212766	0.00106222	0.0240695	0.00583877	0.00204594	0.062817	0.00222532	0.217691	0.00155834	0.00131331	0.0907217	0.0435019	0.00121585	0.00176887	0.0105873	0.00804126	0.00259898	0.0427269	0.00727369	0.0480023	0.0018054	0.0740125	0.00172118	0.00382047	0.0166845	0.702549	0.0369346	0.326746	0.98318	0.0684236	0.947355	0.0633924	0.172723	0.0465712	0.106832	0.00320269	0.00936939	0.071376	0.00280803	0.702109	0.143279	0.00314237	0.0651513	0.00122914
k25	3.98006	0.289009	0.527084	2.7194	4.9019	0.54445	0.409137	0.713008	2.43227	4.98897	1.35741	0.123802	0.307145	1.94812	2.66345	4.63525	0.948759	0.868069	0.997058	2.21232	2.62396	1.74751	0.722013	0.604596	4.3711	0.459259	1.66524	0.314329	0.317449	1.35538	2.48936	0.11384	2.83402	0.976265	1.92064	0.16222	1.96869	2.64441	4.99173	0.721133	0.352106	3.95984	3.87673	1.19526	1.12817	3.94977	4.52484	2.92187	0.925723
k26	0.1452	4.68347	0.347117	0.423266	3.95953	6.75869	0.404469	0.947665	3.91362	0.201731	0.182188	0.14161	0.353904	0.5164	31.062	14.8513	0.163671	0.187841	1.13458	22.4062	19.7854	1.00562	3.01438	8.00865	0.249762	0.494938	2.66731	0.113309	0.303374	2.79075	0.110731	0.450537	0.908826	0.701267	0.493686	0.113954	0.510667	1.43261	0.1	0.262379	0.17592	14.0029	1.70111	6.76496	0.351532	9.77643	0.569597	0.849319	0.102723
k27	0.731006	0.190005	0.228901	0.4893	0.296026	0.171465	0.440013	0.180011	0.218616	0.107295	0.182741	0.122448	0.18398	0.176145	0.111037	0.162466	0.216327	0.122392	0.169242	0.169065	0.377886	0.166151	0.240324	0.100929	0.2669	0.228959	0.267587	0.327951	0.218098	0.188309	0.190713	0.133793	0.200159	0.157757	0.230517	0.351591	0.119804	0.219179	0.223162	0.156629	0.415434	0.202965	0.13697	0.111212	0.133279	0.158151	0.406492	0.182311	0.107426
k28	12.6295	19.6029	8.83892	23.6074	14.2742	9.85085	16.4765	7.29766	10.5785	7.57774	8.10851	18.7696	8.00037	18.1248	18.1788	11.4438	7.22029	14.7526	19.8913	12.5652	13.7368	11.7967	12.9935	7.04249	11.188	15.7134	13.0856	18.1238	16.327	20.5938	15.828	13.3217	20.3702	15.0529	14.3062	14.9003	24.5909	16.2349	11.7008	16.4382	16.284	14.3121	14.492	11.9595	14.1397	21.887	17.1813	20.2958	23.3767
k29	0.00162988	0.00294318	0.0030574	0.00347607	0.00882907	0.00165001	0.00195742	0.001	0.00197312	0.00405328	0.00372458	0.00398524	0.001	0.00145586	0.00406585	0.00209874	0.00103398	0.00198895	0.001	0.00138745	0.0012589	0.00504157	0.00227079	0.00125163	0.00110029	0.0039705	0.00157992	0.00149683	0.00182288	0.00276932	0.00275581	0.00100968	0.00328443	0.00817211	0.00132229	0.00119504	0.00302816	0.00167941	0.00207626	0.00295432	0.00172327	0.00267261	0.00254342	0.001	0.00200653	0.00393743	0.0024235	0.00348298	0.00102409
k30	16.5655	31.6588	18.351	14.9215	44.024	23.3287	23.908	22.9098	28.9939	11.7262	32.9893	33.8654	12.5288	41.5057	23.7231	44.9785	10.2339	22.45	18.1415	36.4148	15.6455	18.9596	14.3742	21.0924	45	22.4983	27.5803	13.766	10.9514	28.1197	33.5387	17.5133	31.9458	12.5032	27.0334	43.5416	17.7243	25.9171	36.6434	30.7009	29.1576	20.6243	23.6528	22.1262	27.4801	22.3328	36.6142	14.7071	14.5709
k31	4.46011	14.1512	12.0342	9.85248	17.9544	7.71332	3.50587	5.07505	18	18	3.64063	9.19523	8.3034	7.76086	8.48488	4.2274	9.4577	18	17.2473	17.7236	6.08646	17.019	12.6631	18	11.4229	16.8269	5.83171	17.9713	8.833	17.9641	13.6029	12.1704	12.12	12.7254	7.36855	10.6936	17.3117	6.6716	9.23248	8.08598	12.0699	6.84399	7.92868	12.9602	12.8939	7.99368	6.43098	18	5.17574
k32	7.13008	13.456	4.22358	7.91983	4.25504	12.8581	14.8284	8.86217	8.61414	4	5.40823	4.0064	4.91359	14.3254	4.0031	10.5108	5.81214	4	6.61884	6.31868	8.54908	4.3715	4.21967	15.3522	6.52119	4.7458	11.1746	13.4076	8.40538	6.11617	5.72574	9.10428	6.70523	4.30182	10.5182	14.623	7.13884	7.43165	5.27442	7.78333	8.18859	8.53467	9.27093	4.89598	4.55959	16.5834	7.57077	6.7454	4
k42	0.00133508	0.00139546	0.00133747	0.00133429	0.00133585	0.00136108	0.00134228	0.0013376	0.0013384	0.00129066	0.00133489	0.0013342	0.00133782	0.00133528	0.00135072	0.00133402	0.00133544	0.00133233	0.00133601	0.00134941	0.0013488	0.00133417	0.00134734	0.00135989	0.00133511	0.00133679	0.00134989	0.00133375	0.00133647	0.00134093	0.00133487	0.00134619	0.00133532	0.00134075	0.00133556	0.00133721	0.00133622	0.00133607	0.00133541	0.00133363	0.00132636	0.00133482	0.00133602	0.00134276	0.00133527	0.00133526	0.00133494	0.0013357	0.00132114
k85	0.0153172	0.0866514	0.0847651	0.00196595	0.0920954	0.00930974	0.0589118	0.0106569	0.0109265	0.0420609	0.00117639	0.0030952	0.00219263	0.00105533	0.0179447	0.00394819	0.00286275	0.0331978	0.0657599	0.00144088	0.0141375	0.00685944	0.0757916	0.00113731	0.097367	0.0175154	0.0380578	0.0954016	0.1	0.0302591	0.0188285	0.00134152	0.0316529	0.0763379	0.00384225	0.00373971	0.0529196	0.00509313	0.0986351	0.0032315	0.00283818	0.0567956	0.00206681	0.0964518	0.093871	0.00838079	0.012616	0.00585799	0.0014532
[truncated: 2,451 more columns]

## Sheet: Results_Stage2
Table S4. Stage 2 optimization results.
	Run1	Run2	Run3	Run4	Run5	Run6	Run7	Run8	Run9	Run10	Run11	Run12	Run13	Run14	Run15	Run16	Run17	Run18	Run19	Run20	Run21	Run22	Run23	Run24	Run25	Run26	Run27	Run28	Run29	Run30	Run31	Run32	Run33	Run34	Run35	Run36	Run37	Run38	Run39	Run40	Run41	Run42	Run43	Run44	Run45	Run46	Run47	Run48	Run49
k1	0.0372502	0.00157743	0.0137545	0.00739207	0.00683024	0.00735715	0.00697339	0.0020304	0.00239995	0.0559924	0.00382665	0.0115837	0.0417459	0.00133386	0.0530697	0.00121851	0.00146309	0.00778935	0.00572428	0.00236069	0.0126564	0.00818469	0.00149556	0.0775431	0.0269544	0.0038214	0.00855747	0.00581758	0.00504006	0.00186571	0.0039231	0.0190365	0.00462597	0.00115973	0.0129218	0.00250526	0.0329162	0.00147659	0.0277341	0.00415671	0.00127076	0.00143225	0.00899256	0.00874845	0.0469543	0.0930572	0.00168032	0.00591227	0.00649077
k2	0.391818	0.0632313	0.0841535	0.151572	0.53202	0.0534288	0.453939	0.226858	0.0717063	0.618599	0.245317	0.455978	0.0606702	0.0344698	0.0856796	0.0704349	0.371404	0.344958	0.765368	0.48193	0.0367179	0.687931	0.0972607	0.391038	0.251965	0.329283	0.295178	0.355061	0.27771	0.049794	0.0361627	0.745811	0.611055	0.387199	0.228954	0.260425	0.909235	0.814115	0.0381156	0.24897	0.0645114	0.668231	0.125793	0.052212	0.355058	0.985922	0.548301	0.263544	0.0401994
k4	6.066	2.72408	2.05766	6.29902	6.37279	8.33773	2.19565	1.31294	5.88885	5.03918	4.32984	1.26477	5.70521	7.91379	3.19858	4.32745	6.42014	1.63764	1.74749	8.98653	2.25001	1.2162	5.19917	2.39658	4.85746	1.78207	2.64956	3.25854	7.62736	4.26626	6.64673	9.46564	9.33021	3.81564	2.13331	2.20838	9.75704	4.59491	7.48451	7.97257	3.30382	6.04813	4.10892	1.52459	3.46896	5.67422	2.49504	2.62062	6.97682
k6	0.142988	0.341569	0.163922	0.0831298	0.0941024	0.521779	0.176707	0.0471718	0.920033	0.421796	0.663003	0.0402769	0.132908	0.154564	0.336709	0.0416753	0.09775	0.0688698	0.386635	0.412449	0.0350217	0.120291	0.224934	0.942072	0.777071	0.833807	0.420785	0.374013	0.0875145	0.317822	0.0410146	0.763521	0.138224	0.0667475	0.0665291	0.0563259	0.773236	0.0669785	0.330256	0.280332	0.360949	0.0667912	0.117427	0.363515	0.164242	0.0791537	0.330177	0.0912939	0.7887
k8	0.608448	0.151942	0.354699	8.09261	1.3574	0.69736	1.31757	8.43029	5.63082	0.139336	1.44968	5.55296	0.296305	0.493999	3.01359	0.415076	7.13793	0.749233	0.238374	2.12937	0.248907	6.25775	1.37156	5.4474	2.07646	1.11335	0.672854	5.64301	4.06793	6.98733	0.307931	10.7163	4.74568	1.36931	6.26118	1.89915	19.7112	0.815742	10.9278	0.352767	0.599534	3.18769	2.4011	0.273588	0.793796	0.105103	0.31377	8.42051	0.240928
k22	0.173127	0.0289355	0.660572	0.117375	0.12302	0.154491	0.353701	0.132075	0.046647	0.135352	0.287767	0.0371693	0.293046	0.101634	0.383885	0.0635468	0.389063	0.522884	0.125469	0.90033	0.0231982	0.01349	0.559459	0.241399	0.42936	0.57641	0.511022	0.163062	0.0377987	0.127089	0.930628	0.0462459	0.421967	0.395841	0.304582	0.0537934	0.960394	0.185768	0.0107214	0.0842597	0.0152234	0.0319782	0.658132	0.1716	0.259719	0.031059	0.0288969	0.017613	0.0278626
k23	0.0751757	0.099516	0.0241494	0.0146564	0.399853	1.19229	0.880714	0.0399849	0.0604802	0.144537	0.0446872	0.826795	1.60182	0.104924	1.79438	0.0239559	0.0120539	0.250214	0.864235	0.233603	0.531658	1.09647	0.94658	1.56546	3.95765	0.183579	1.159	1.07193	0.0131262	0.634545	0.0346603	0.0820747	0.596198	0.0312387	0.457601	0.135216	4.83536	0.894147	4.0005	1.26262	1.7889	3.37391	2.09827	0.0359834	0.435397	5	0.0210399	0.0139356	0.343808
k24	0.0391413	0.457675	0.0153782	0.0147835	0.00237731	0.164545	0.023094	0.0880234	0.00963496	0.297808	0.00317137	0.788855	0.0068888	0.00644867	0.661613	0.0301768	0.0605346	0.00785798	0.104771	0.100755	0.0158462	0.0415208	0.0691273	0.313505	0.0394674	0.00330781	0.00211826	0.939818	0.00182031	0.0161746	0.280533	0.040915	0.00657674	0.284358	0.0013666	0.7324	1	0.160211	0.0479691	0.0404876	0.113849	0.0160619	0.138688	0.026106	0.00869946	0.00688373	0.0663371	0.309469	0.0249129
k25	0.0660117	0.981112	0.0542363	0.0635222	0.0313969	2.948	0.178982	0.0397769	0.0747548	0.485203	0.0416915	0.143116	0.595765	0.0105645	2.14024	0.617435	0.0415235	0.698257	1.07309	0.108043	0.3308	1.1071	0.454668	1.30884	0.101509	0.1416	0.0528851	0.836467	0.837489	0.215903	2.23655	3.2953	0.0115451	2.26812	0.431116	0.12707	5	2.18058	1.21069	0.144003	0.0875873	0.0206981	0.305555	2.63033	0.0998711	3.62293	0.0675775	0.990186	0.129457
k27	0.473124	0.394551	0.342669	0.141322	0.263218	0.216978	0.288866	0.324931	0.591644	0.270473	0.443911	0.38492	0.677022	0.153639	0.131131	0.523489	0.669011	0.123175	0.450988	0.124099	0.162806	0.1301	0.402122	0.858661	0.612012	0.194999	0.325826	0.252673	0.70768	0.439263	0.471833	0.579824	0.42755	0.123966	0.182276	0.126674	0.788657	0.251371	0.533617	0.277581	0.390392	0.519531	0.131084	0.157585	0.133354	0.255003	0.522768	0.377415	0.811116
k29	0.00601669	0.00142681	0.00255946	0.00215285	0.00528075	0.00589992	0.00577177	0.00639133	0.00487933	0.00454915	0.00123638	0.00969372	0.00295718	0.00111918	0.00113004	0.00315945	0.00735438	0.00869668	0.00720096	0.00539933	0.00108295	0.00553796	0.00335146	0.00107623	0.00242376	0.00352618	0.0015676	0.00212345	0.00660338	0.0061745	0.00495063	0.00522431	0.00582373	0.00170672	0.0041514	0.00368157	0.00898201	0.00381038	0.00264542	0.00329645	0.00128067	0.00321712	0.00267844	0.00105675	0.00119094	0.01	0.0023684	0.00825664	0.00478958
k31	3.99154	3.78727	4.78763	4.63283	4.75336	2.8436	2.88758	13.8342	8.50491	11.6586	2.36479	6.55738	9.84402	2.36258	14.5181	11.6541	2.66972	5.86018	15.5916	9.09955	4.54436	4.0442	11.4039	5.21692	12.5707	3.36167	2.16029	12.8268	5.13217	6.85148	6.38055	7.12091	4.58033	3.04656	8.06023	3.77988	17.9471	10.2677	2.63759	3.24983	4.54105	2.54938	9.49051	9.20203	7.37932	10.1281	7.63683	10.5453	7.73068
k33	0.00926657	0.00110175	0.00626773	6.9737e-05	0.000247107	0.0195317	0.0420169	1.22046	1.34561	0.00271689	0.000993793	4.01503	0.00437818	0.00218849	0.304059	0.00172384	0.16371	2.10421	5.81228	1.01616e-05	0.0022956	1.45431	0.105487	2.44399	0.0690168	0.0238789	0.335982	2.74974	0.281219	0.0372314	0.563271	7.10019	0.000167702	1.45859	0.178102	0.054589	8.07107	2.77612	0.00052105	0.000205745	2.85001	0.0403361	0.982744	4.21367	0.00455892	10	0.00147196	2.08421	4.91565e-05
k34	0.00011113	6.31293e-05	0.0167451	2.78287	0.000162597	6.07705	1.14469	0.000227601	0.000280748	0.082615	0.000323363	6.77604	0.00106065	0.330367	0.0325642	0.0571255	1.86513e-05	1.21922	7.09523	0.00818482	2.58895e-05	0.0146015	0.345247	9.65858e-05	3.17388e-05	0.00109693	0.106858	0.0137484	0.000545514	0.280324	0.00168267	0.00279801	0.00358609	0.052278	0.153079	0.013688	7.39992	0.054773	0.00113341	8.88236e-05	0.1565	0.593152	0.0177005	2.13869e-05	0.000329752	1.14875e-05	0.0288747	4.18765e-05	0.000524766
k35	0.146177	0.0281421	0.000561003	0.165183	0.0396165	0.00158973	0.108666	0.0028958	1.61582e-05	0.203299	0.535195	0.000107809	4.74424	0.613044	0.000736187	0.000380979	0.0257617	8.4247	0.40665	10	1.03152	0.00291992	0.0141675	0.0167231	0.00779864	0.0267248	0.0733269	5.0677e-05	2.43108	2.75175	0.0375926	0.278729	0.000668208	0.0014895	0.0410163	1.13615	7.69951	0.000795152	0.056397	0.000189395	0.00822669	0.0389835	0.17557	7.9679e-05	0.00010335	1.34253	0.0111721	0.0256428	4.02013e-05
k36	0.00629752	0.0710485	0.25259	0.000782528	2.1268	0.0238376	0.00253031	0.00042262	0.21924	0.0148123	0.13962	4.81621e-05	0.0268045	0.00800295	0.0256449	0.00183799	0.0530971	0.734318	0.305183	0.000417598	0.205674	0.116495	0.200711	0.0101605	0.00352438	0.147582	0.318978	3.79086e-05	0.0102902	0.139581	1.41922e-05	0.0916731	1.23401	0.175243	0.00030281	0.600311	2.85746	0.00221964	0.000201988	0.00426419	4.68331	0.00394193	0.598897	0.00110745	0.000242113	0.435133	0.105952	0.147939	0.000601518
k37	1.06881	5.67668e-05	0.00617886	0.0433026	0.0917886	0.00803873	0.000399039	1.1553	6.56656	0.000628905	0.025541	0.00412485	3.0813	0.00113147	0.276256	0.00123913	1.17865e-05	0.000110479	0.000285106	0.00112549	0.00485463	0.336136	0.149453	1.90445	0.645494	0.0403317	0.0194311	4.24408e-05	5.00688e-05	0.0166869	0.256054	0.00823596	0.0154879	4.31937e-05	0.0284164	0.229982	6.01501	0.107028	1.56621e-05	2.25832e-05	0.18769	9.68187e-05	0.00215068	3.76145	0.0116632	1e-05	3.01342e-05	0.068539	1.01475
k38	0.0292656	0.0431669	0.019798	7.65313	0.0041546	0.0303227	0.00892144	4.54517e-05	0.199125	0.00299077	0.586162	0.00185384	5.07613e-05	0.175484	0.0365863	0.000204977	0.251493	0.164812	1.17428	1.35658e-05	1.05306	0.000141555	0.294269	0.170269	0.082881	6.29169e-05	0.000220803	0.531236	0.815215	0.733726	0.360628	0.00123935	5.20467	0.0335039	0.0196458	0.68957	7.2632	1.75354	0.0152305	0.000165065	0.312125	0.284995	0.019093	0.008573	0.0859807	1.19196e-05	0.00046658	4.80165e-05	0.203138
k39	1.16376	0.00175853	0.00332166	2.69265	0.124892	0.0139979	0.0703828	2.82467e-05	0.120481	0.0291208	0.00126658	0.0301795	1.79092	0.00712122	0.00211914	0.166132	1.43169	0.110357	0.0168734	3.69993e-05	0.0218853	0.000593958	0.582862	7.18872e-05	6.18095e-05	1.22461	0.000716045	0.00657985	0.555913	8.04701e-05	0.00012775	0.00114595	0.0802834	0.00498922	0.00022286	0.159686	7.87146	1.58691	1.92452	0.0802873	0.00763617	2.69511e-05	0.062879	0.000157257	0.0413127	10	0.0102179	0.0153406	2.6385e-05
k40	0.0509491	3.03561e-05	9.10795e-05	0.00134258	1.63487	0.00631369	0.000306145	0.00811345	0.201249	4.32226	0.399582	0.0303613	0.0561634	0.0373504	0.00213671	0.235851	0.000702473	0.000978923	0.000163086	0.00638584	0.248439	0.00229185	0.0104539	0.0358825	2.01397	0.781553	0.618139	0.893482	0.000307454	0.000730365	0.138143	0.000286561	0.334228	0.000108016	0.0704817	4.45554	8.19291	0.630162	0.0270981	0.00226497	0.0709033	0.116058	0.000376109	0.486707	0.00228467	1.24094e-05	0.00170732	0.0830526	1.77206
k41	0.278805	0.000559317	0.167057	0.00164558	0.000174267	1.22844	1.597	0.0147831	3.26966	0.0411206	0.106761	6.31947	0.000721048	5.7436	7.24993	1.43251	1.23188e-05	2.54234	0.000711056	0.184653	0.251364	0.000365574	0.014618	0.0263175	0.627445	0.00502115	0.000199887	0.0521182	7.90838	0.000121083	0.208459	0.122847	0.0150357	0.000979121	0.00805903	0.0981534	9.99978	0.000263337	0.0111891	4.68144e-05	3.08663	2.16502e-05	0.00146153	0.000249288	0.000266655	4.4602	0.00544027	3.22245	0.0175623
k42	0.0253649	0.0142466	0.00532151	0.00672957	0.00165472	0.0114411	0.0289261	0.0323726	0.0372484	0.00150858	0.0458637	0.0148941	0.0048208	0.00166722	0.0147201	0.00541264	0.00449194	0.00791595	0.0370191	0.0338387	0.00992011	0.0111404	0.00322705	0.00100915	0.00239004	0.042066	0.00530429	0.0139819	0.0179411	0.00310285	0.00511516	0.0835952	0.0236735	0.0201296	0.00744486	0.00254948	0.00695256	0.00511254	0.0217252	0.00375604	0.0326926	0.0342541	0.0028148	0.00776175	0.00908379	0.00167657	0.00630895	0.00947268	0.0106911
k43	3.68998	5.59958	1.42158	0.218134	0.00216523	1.50476	0.0319159	0.00215981	0.00291119	0.00436302	0.203196	0.0185197	1.00058	0.0155858	0.0107725	0.960052	0.27831	5.07007	0.313756	0.00310092	0.161959	0.561739	0.343816	3.86526	0.0202092	2.23791	0.0742494	0.00421243	0.00115568	0.0211951	0.203715	2.85259	0.0395374	0.00352161	0.147754	1.93304	10	0.00389687	0.0207196	0.219087	0.00274709	0.00144196	0.0492043	5.8995	0.0360552	0.00115405	0.653943	0.0187707	0.0725369
k45	0.216599	0.0563947	0.0888568	3.67955	5.38857	1.28662	0.00788173	0.67636	0.289962	0.0518955	0.602435	0.395563	0.00383437	0.145048	0.0270807	0.091673	0.0296842	0.0137309	5.06508	0.011931	0.00804646	0.506525	0.98516	0.00274692	0.0880258	0.366101	0.654728	0.0615699	0.00123262	0.128436	0.00352346	0.0224967	0.181042	0.0261404	0.00905513	0.00164998	9.99892	0.0274226	0.00925371	0.0516922	0.00699074	0.00151458	1.52274	1.11197	0.0836336	0.0403813	0.145549	0.0258609	4.93005
k47	2.80196	0.0018454	0.800234	1.55496	0.0021879	0.0668712	0.030671	0.875424	0.99159	0.0244945	0.990901	0.351077	0.0249567	0.190851	0.848353	0.0357541	0.00284443	0.0406466	0.271602	3.30952	2.35067	0.160943	2.37062	0.0740451	0.0539358	0.208769	0.908665	0.00214118	0.0970917	0.0334174	0.101087	0.469028	0.00768021	0.0723149	0.043474	0.0297269	10	0.00905959	0.117067	0.0275493	1.97718	0.0103496	3.6984	0.0320543	0.275054	3.77521	0.402749	0.664907	0.173077
k49	0.00337938	0.0120405	0.00418005	0.00273327	0.0243465	0.010202	0.00540118	0.0626848	0.00189576	0.171789	0.0103403	0.403864	0.00484336	0.445417	0.0337109	0.0097498	0.023362	0.0388454	0.0338342	0.0119068	0.00328939	0.0498654	0.0423948	0.530767	4.4132	0.333403	0.0214761	0.00382037	0.00184663	0.803653	0.0769856	0.00120046	0.010937	0.043468	0.0382705	0.033081	10	4.29375	0.01061	0.00765678	0.00523916	0.00243846	0.0117682	4.13224	1.19305	2.435	0.0649226	0.00454165	0.0390335
k63	0.211664	0.131765	0.00029702	0.034102	0.000860965	0.145941	0.0533494	0.443637	0.162938	0.00108073	0.000561159	0.000249423	0.013389	0.000243677	0.00416259	0.00171729	0.0063531	0.00439035	0.253902	0.00401111	0.538258	0.153586	0.00496814	0.00414793	0.00104386	0.00284734	0.0576992	0.0842423	0.00460328	0.00168144	0.151978	0.000367104	0.142963	0.256106	0.00457456	0.000194172	1	0.631133	0.142596	0.000692879	0.0160996	0.000773452	0.000971605	0.00331782	0.00338098	0.984909	0.0183906	0.115581	0.473188
k64	0.0743062	0.136357	0.0231099	0.416059	0.0543489	0.0391765	0.00139873	0.317516	0.497884	0.000639442	0.0476403	0.752816	0.00432234	0.00468301	0.0257869	0.186126	0.000864774	0.0646055	0.0122914	0.000254301	0.00232432	0.501003	0.00745738	0.000928891	0.00687251	0.0355742	0.15648	0.00704835	0.00235855	0.0888074	0.0205828	0.239391	0.00729103	0.0264314	0.00657906	0.00419565	1	0.0746653	0.00364417	0.000236005	0.00147057	0.00352236	0.0300946	0.183174	0.0955632	0.000852674	0.0509531	0.028043	0.000187817
k65	0.00133447	0.000473925	0.000244875	0.00168826	0.00282061	0.0001	0.00176765	0.0543179	0.0432563	0.0112512	0.0216097	0.256273	0.032434	0.000620477	0.00272044	0.348866	0.0387536	0.00290406	0.34219	0.0263304	0.0348139	0.000336071	0.079517	0.92104	0.00439136	0.0144493	0.000239358	0.00377346	0.00791381	0.000511206	0.00324319	0.00238185	0.0044609	0.00223019	0.00343835	0.000221932	0.477334	0.000573113	0.0639516	0.223023	0.00345378	0.0415792	0.000928727	0.824232	0.00064682	0.00203584	0.000368008	0.00611145	0.0121502
k66	0.028914	0.376862	0.0194841	0.0575991	1.07354	0.133921	0.113014	1.81905	0.407931	1.17103	0.7744	0.0557655	0.333874	0.420329	0.438526	0.00664434	5.12483	0.00300487	1.96784	6.11024	0.0107806	0.0378175	0.00985453	0.0113513	0.0332096	1.81562	0.0194621	0.0962892	4.90153	0.237683	0.103737	0.00492081	0.25135	0.0253089	0.13513	0.00291694	0.0167236	0.0170974	4.22899	2.72875	1.4789	0.130273	0.0724106	0.00800582	0.0764203	0.00115478	0.392607	0.595588	0.249995
k68	0.00431331	0.00562226	0.00474831	1.16944	0.00250708	0.0951796	0.0849272	0.00945349	0.521726	0.00653268	0.183308	0.00540053	0.0139887	0.0921512	0.00443402	0.405847	0.00768647	0.00149167	3.59886	0.751785	0.276855	0.0339936	0.01012	0.00476841	0.00944933	0.0207914	0.00472705	0.00907887	1.56595	0.00175817	4.62963	0.00466716	0.00624188	0.573214	0.0763301	0.0571411	0.321318	0.010835	0.00570919	0.0106178	0.142998	0.00311212	0.276305	0.0241236	0.00450647	0.0125466	0.325653	0.119714	0.0852434
k70	0.0730552	0.457706	0.00938761	0.900928	0.0727394	1.42623	0.223555	0.615273	0.929019	7.54371	0.629804	1.27898	0.0884727	0.0617758	2.27515	1.18476	0.18847	0.0856314	6.90221	0.245783	0.0666307	0.263215	1.09713	0.11171	1.28735	0.00871649	0.246038	1.6038	0.291943	1.76283	5.69278	1.71073	0.395114	0.153462	0.215426	0.590891	0.387416	3.4015	3.59556	4.52274	0.22063	1.80999	0.201193	0.698689	2.89078	4.14143	0.156481	0.0403293	0.210635
k72	0.0143521	0.049826	0.00725454	2.58777	0.00420288	0.0733551	0.00688252	0.0139749	0.00138175	1.44174	0.0084448	0.0733554	0.0150586	0.0279755	0.0374326	0.00811499	0.0329744	0.00394312	0.0213232	0.00130775	0.0177392	0.0310563	0.0294178	0.0133108	0.00427511	0.00759359	0.00599503	1.0155	0.00217033	0.168113	0.0182984	0.00300208	0.00526014	0.00793764	0.00521365	0.0561656	2.08137	0.0135778	0.202145	0.0209869	0.0374123	0.00372276	0.0096229	1.62318	0.0217635	0.011104	0.011306	0.00448678	0.0156321
k74	0.000160591	0.177009	0.0452628	1.00817	0.173414	0.465024	7.44206	0.00343382	0.734984	0.376689	0.00421592	7.1801	0.329609	0.0373539	0.00071446	0.0414756	2.71481	0.865773	0.00885406	2.79678	0.244919	0.159427	5.90248	0.880652	0.0258788	0.863945	0.334425	0.00367527	5.15742	0.849245	4.82865	0.000315103	0.540968	0.313098	0.360623	1.16239	2.51872	0.0208505	0.0216333	0.145026	0.00777135	1.23326	0.326884	0.995611	0.166581	8.05842	0.0021498	4.01324	0.261817
k75	8.56562e-05	0.812464	0.000164269	2.74059e-05	0.00120981	0.00157466	3.50863e-05	0.0355048	0.00128354	0.00184986	0.371449	9.26612e-05	6.43997e-05	0.000128197	0.230406	4.83194e-05	9.89022e-05	0.00013364	0.00393664	0.000604824	5.35539e-05	0.00182671	0.000279373	0.767274	0.000399274	4.57482e-05	7.29773e-05	0.02561	4.18771e-05	0.00214422	0.00938134	1.09161e-05	0.103782	2.28099	0.000175725	0.765505	2.06854	2.40633e-05	0.000610087	0.0387162	0.0117803	0.036446	0.00983901	1.30388e-05	0.00166608	1.24094e-05	6.25148e-05	0.000935359	8.30461e-05
k76	0.283991	2.60461	0.00587757	0.00123706	1.69296e-05	0.0875144	1.6857	0.000464564	0.127651	0.000274543	0.225903	0.0376117	0.0160133	2.79644e-05	1.18498e-05	0.0791693	5.43657	0.0348041	0.0070891	7.36221	0.00401154	0.172174	1.41277	0.311784	0.0477732	0.000752353	0.0177735	0.00353579	0.000216402	0.00174267	0.0935805	0.0172861	0.00108281	2.21693e-05	2.70662e-05	0.00494441	1.38059	0.238443	0.104832	0.990496	0.739685	3.44863	0.000636582	0.0220233	0.539488	1.38009e-05	0.00550014	3.59099	0.00532377
k77	1.18581	0.000279811	0.00121559	0.173047	3.49979	0.000300949	4.93256e-05	0.00110919	0.0479452	0.164439	0.000459355	4.0494e-05	7.99739e-05	1.75582	0.00051761	5.47995e-05	0.361091	0.00775637	0.0298832	0.198559	0.0132374	0.000858938	2.38078	5.48027	0.00710033	1.78085e-05	0.503513	0.0383274	0.00303111	0.00985468	0.0514998	0.00172005	0.0685652	0.00883444	1.15714	0.00208394	8.94291	4.10939e-05	0.000565972	0.0233518	4.49692	4.6574	0.00457026	0.000625792	0.000758999	0.000138545	1.67407	2.59069	0.000638426
k78	0.0045616	0.000360047	0.0043923	0.00288332	0.00631937	10	0.0166077	0.85922	0.000544232	0.0505231	0.000804557	3.78697e-05	0.0136987	0.0123405	0.000798948	0.000274581	3.40049	0.407587	3.45983	0.0612073	0.00111192	0.0313105	0.0526723	0.00116921	0.00424322	0.00219671	0.000102352	0.0600775	0.0035465	1.57684e-05	0.00256874	0.00358857	0.223676	0.000117271	0.000930554	0.00331018	6.6877	0.0467047	1.22037	0.25711	0.979773	0.00193888	0.817834	2.65996e-05	3.71334	8.05842	0.0141991	2.04684e-05	0.184628
k79	0.346673	0.00479255	0.00275639	0.0361282	0.0383533	0.123019	0.00418756	2.05298	1.17013	1.63206	1.42756	0.012073	0.576029	6.41972	1.5129	2.43901	0.0260802	0.124416	1.43493	0.225083	0.120103	0.0014326	0.0389847	0.0203855	1.33116	0.00720612	0.00824145	0.115313	0.898436	0.302205	0.000409214	2.34097	0.0525372	0.103802	0.0381879	0.0087841	6.07902	2.82583	0.418413	0.377904	0.110303	2.12399	0.0224255	1.5455e-05	0.169147	0.128377	0.529988	0.0161748	0.156594
k80	0.551509	0.0464229	0.000291952	0.0534885	2.97397	0.0136261	0.00568725	0.00375022	0.11385	3.48587	0.204941	0.00560159	0.000554933	0.137175	0.000260182	0.000130394	0.000125847	0.00171295	0.48726	0.638825	0.0627844	0.025328	0.0900114	5.07615e-05	0.00014305	0.164799	0.745718	0.0302196	0.674581	0.000385429	0.075345	0.00177076	0.00483182	0.0907299	0.000791997	0.047629	0.591817	2.70533	0.00304388	4.25407	0.00835323	0.000204339	0.000538841	0.0344297	0.00599767	8.67407	0.353755	0.0309863	0.0431284
k81	5.588e-05	0.881305	5.54541e-05	0.0154429	0.0658816	0.0743937	0.000329734	7.99259e-05	0.631828	0.00400133	0.00777893	0.0107743	0.000126046	1.29957e-05	0.000115364	3.32555e-05	0.00121218	4.66992e-05	0.594102	5.37437	0.00270658	0.000636064	0.286956	3.30623e-05	4.09065e-05	0.0151615	0.000490448	0.0571795	0.653953	0.27851	0.00278939	0.381403	0.000512783	0.000661349	0.00013165	0.00207248	4.8769	0.203136	0.00041377	0.0431613	0.00363525	4.81721e-05	0.0108076	3.8589	0.00318621	0.00703702	0.00299097	0.0169293	0.000164964
k82	0.644848	0.137131	0.00122499	0.000982932	0.0118331	0.00884992	0.000814792	0.105278	0.0144948	0.0972433	0.00390585	0.000249843	0.00717979	2.06595	2.78744	2.49893e-05	0.000294794	0.0038918	0.00567916	0.72755	0.363074	0.944875	0.00131719	0.000456119	0.849537	0.014448	0.00902407	0.846994	0.00763558	0.936883	0.555243	0.003549	0.0121123	0.000133881	0.000224164	3.45951	0.368371	8.47276e-05	0.313001	0.98181	7.88724e-05	5.87688e-05	0.100232	0.000269018	0.0424737	10	0.0138663	0.340547	0.173138
k83	0.00650215	0.000743169	0.000663581	0.00299098	0.00483464	0.0168436	0.00248391	0.00604927	0.0757939	0.129086	0.0213642	0.00239744	0.00348273	0.00533891	0.00138739	0.000471977	0.000301432	0.00540457	0.010638	0.0910977	0.0110298	0.000826984	0.00658996	0.132574	0.000744656	0.00466782	0.0045492	0.0344746	0.428393	0.000811427	0.000238708	0.00544148	0.011668	0.00531231	0.00242127	0.0037255	0.00415328	0.0312824	0.0165598	0.00322355	0.00611533	0.00102561	0.00118211	0.000277152	0.0259067	0.000245337	0.0478931	0.0101781	0.0528067
[truncated: 2,451 more columns]

## Sheet: HealthyParams
Table S5. Parameter Sets for the healthy population.
	Run1	Run2	Run3	Run4	Run5	Run6	Run7	Run8	Run9	Run10	Run11	Run12	Run13	Run14	Run15	Run16	Run17	Run18	Run19	Run20	Run21	Run22	Run23	Run24	Run25	Run26	Run27	Run28	Run29	Run30	Run31	Run32	Run33	Run34	Run35	Run36	Run37	Run38	Run39	Run40	Run41	Run42	Run43	Run44	Run45	Run46	Run47	Run48	Run49
k1	0.004	0.004	0.004	0.004	0.004	0.004	0.004	0.004	0.004	0.004	0.004	0.004	0.004	0.004	0.004	0.004	0.004	0.004	0.004	0.004	0.004	0.004	0.004	0.004	0.004	0.004	0.004	0.004	0.004	0.004	0.004	0.004	0.004	0.004	0.004	0.004	0.004	0.004	0.004	0.004	0.004	0.004	0.004	0.004	0.004	0.004	0.004	0.004	0.004
k2	0.0839497	0.0950604	0.335751	0.0482591	0.0489333	0.150696	0.214001	0.113013	0.0584556	0.0343809	0.92136	0.887657	0.480311	0.174451	0.100766	0.518929	0.574138	0.899191	0.839446	0.463554	0.324419	0.482406	0.638831	0.0505234	0.190011	0.136603	0.540873	0.584113	0.0927916	0.164164	0.0335106	0.247015	0.144577	0.0423255	0.181511	0.59835	0.281572	0.396246	0.114431	0.0445711	0.157833	0.890518	0.326143	0.459458	0.0710141	0.409523	0.99711	0.24938	0.544789
k3	27.5668	10.2879	12.6056	20.3447	37.1615	29.4151	28.4447	17.0867	21.9973	39.8954	18.5547	35.4792	28.0983	18.7292	11.8963	13.2441	14.7024	9.30405	10.3862	14.3569	16.0571	24.1956	28.0585	7.94763	8.72477	12.3927	23.4613	15.6553	15.131	16.7369	7.77752	8.11531	29.4805	8.29496	9.11874	38.0105	15.7742	11.8025	11.9497	29.1162	22.2023	31.0135	16.2249	11.2321	14.5526	11.6171	24.942	14.6774	7.54195
k4	1.28764	6.70718	5.01223	1.06412	1.02968	2.08194	4.76196	2.76898	2.01634	9.81321	1.28944	2.04327	7.6377	1.46273	3.24404	2.50524	1.0055	1.25802	2.18075	1.57119	2.47193	8.58218	2.07153	4.76815	6.90697	1.53072	3.41326	1.80596	1.77749	4.00318	2.41904	1.4344	6.64214	9.17792	2.93774	9.21877	7.44304	5.63978	1.67859	1.76909	2.2841	4.29323	4.64125	3.08998	1.4579	2.91816	2.04101	2.19184	1.03125
k5	7.99621	11.407	4.04163	19.0086	4.28521	3.52845	2.68914	9.37975	7.13873	11.3358	6.47627	9.88822	7.69432	3.37384	19.4722	2.69522	2.38325	2.98883	8.52138	7.56494	8.12166	18.1216	2.50736	2.2684	7.53969	8.85812	5.62373	2.55826	6.07294	3.80526	3.97179	11.2095	4.43025	17.9446	9.253	3.80345	4.83935	6.54631	14.3425	11.8215	10.2832	13.0489	5.81679	17.9819	6.60395	9.08729	11.1069	6.56981	8.75091
k6	0.227887	0.89931	0.198535	0.0391777	0.326346	0.0347945	0.693429	0.145941	0.0840163	0.912257	0.165006	0.295683	0.962727	0.211242	0.0605203	0.287537	0.08992	0.0335393	0.0744053	0.280182	0.0392386	0.192941	0.0591105	0.0465777	0.275206	0.22881	0.0852398	0.085317	0.100379	0.12398	0.655745	0.154826	0.431849	0.908214	0.119477	0.113056	0.18307	0.506029	0.032025	0.206971	0.188742	0.914462	0.0810855	0.677302	0.129418	0.0963667	0.413427	0.441341	0.812744
k7	21.9114	48.772	13.1359	25.8754	48.5655	49.9233	10.5049	23.1825	15.1123	30.4008	7.85818	10.517	5.84865	36.3122	5.87288	39.5576	6.62873	12.2959	35.732	21.1485	13.6115	7.18061	28.2132	7.25714	36.2975	20.0529	16.3338	15.2176	8.86056	15.4196	15.4448	35.9791	18.6074	43.3516	21.2023	48.8425	30.2539	16.301	21.9023	16.423	22.6533	21.6747	36.0647	16.7234	13.2595	32.0273	43.2486	28.4731	45.0714
k8	0.8714	3.99621	0.211853	0.178068	0.795413	0.186839	5.6169	9.99222	1.93782	1.63672	0.579375	1.96582	19.9677	0.141849	3.72472	0.583106	0.621278	0.127557	0.586436	10.9161	4.70876	4.79578	4.98855	4.62804	9.30877	0.105858	4.84244	0.568626	1.58573	1.28126	1.69596	0.367521	0.247234	0.207384	0.400966	19.2479	2.72355	2.56601	6.0482	3.08717	0.946052	7.08929	3.20765	19.8807	8.70421	0.832334	0.268106	0.177317	0.128473
k9	5.76026	1.00001	4.89011	1.42087	8.26243	2.83142	4.14318	2.17913	4.07638	16	8.15671	1.99423	8.26509	2.69636	15.2121	3.14962	6.23974	1.10421	7.25002	1.02156	3.53655	8.22934	2.0769	5.71842	1.87143	14.6107	2.16382	14.2773	7.77355	1.99821	1.60002	3.50383	4.2506	15.7435	4.57786	15.4173	2.55858	5.4991	7.29556	1.59763	7.16155	2.74853	3.68318	2.43689	5.85415	9.6946	13.0152	6.42863	1.04101
k10	7.11868	42.2116	13.0545	19.5969	71.7051	60.5851	66.3778	69.7269	18.6262	59.5326	17.8284	15.8928	74.2883	73.678	71.5258	20.3151	14.4533	4.72062	4	31.9927	24.8318	30.1996	40.9978	67.504	74.8184	39.8027	19.4994	10.7036	19.1092	21.5038	18.4069	5.2876	49.4312	71.014	28.5465	38.4262	10.7412	13.0986	29.1712	44.8208	16.3094	14.9839	60.1906	46.7796	60.523	28.9718	30.9768	53.0813	69.3396
k11	15	15	15	15	15	15	15	15	15	15	15	15	15	15	15	15	15	15	15	15	15	15	15	15	15	15	15	15	15	15	15	15	15	15	15	15	15	15	15	15	15	15	15	15	15	15	15	15	15
k12	9.63377	73.2341	28.1744	30.2276	10.8376	33.0563	33.3166	15.3276	46.647	4.92381	43.0195	12.7097	25.485	22.7897	71.8669	42.8464	29.4098	4.88404	74.6795	50.5923	22.9057	46.9685	5.60155	17.8391	18.0879	14.4228	25.0202	4.41304	19.0621	14.838	33.5651	16.7503	64.9988	69.0152	21.1897	73.4812	24.0052	21.2041	6.01696	13.4507	10.4112	20.3603	18.1055	8.75644	52.8213	64.9392	27.7219	11.0763	16.2726
k13	0.163388	0.964698	0.226795	15.6092	0.52919	0.540753	6.58415	0.86754	0.307387	94.3951	7.42157	1.59504	1.28448	0.304624	1.05956	1.42408	1.83395	0.12769	0.123532	0.218931	0.134091	8.4533	0.104092	0.161562	1.28997	0.2549	0.79767	0.128006	0.346453	0.792184	0.125191	0.154616	2.52762	18.0361	0.62974	2.01284	0.190672	0.127539	0.679709	2.15027	1.28812	0.434035	0.579809	0.403878	6.53805	4.18366	1.50572	0.32534	98.2061
k14	1.54089	0.133375	3.56991	5.12064	68.4665	0.253756	1.55553	7.39196	0.153416	8.8158	0.379138	0.854899	81.9291	0.105032	21.6331	0.485826	0.109039	0.528851	0.904167	13.4569	1.27935	5.59297	0.61972	5.40512	0.407542	0.672339	1.60862	3.50029	8.71311	2.40209	2.7008	0.129761	60.489	0.144835	11.4083	18.7887	8.11036	5.29366	1.98577	21.5171	4.4211	0.519743	3.28224	14.5014	65.4637	22.437	97.7795	0.39682	0.362809
k15	9.22043	8.55456	4.4585	72.0472	68.2177	2.6559	39.0074	1.91175	8.99184	52.5187	16.0987	12.088	18.8171	1.09056	13.608	4.96224	0.904777	2.65934	7.28773	59.5541	3.72847	2.216	5.07979	1.64168	1.07275	0.588369	1.76985	25.832	5.11689	19.3006	67.8527	4.01505	40.225	1.51646	19.3214	13.2807	23.8657	11.1614	1.89767	27.9848	26.3241	5.29963	9.74534	5.60359	23.4026	48.1713	30.9878	0.64639	1.23897
k16	50.6616	50.7478	31.7939	60.3564	46.7559	61.8018	34.1859	24.0827	50.0526	46.9173	73.2734	30.2656	21.4417	72.2897	66.0446	30.0187	34.7445	67.286	50.203	28.997	61.0159	38.6872	23.3107	50.2141	20.0628	51.3986	51.1448	26.9891	30.1904	58.4814	51.9292	29.5604	42.9104	27.6868	38.396	88.3172	35.7294	39.7622	23.6031	41.1537	52.2082	87.6564	32.407	23.3464	24.6989	51.5785	48.8059	37.2358	20.9748
k17	0.202066	0.133316	0.295155	0.0763396	0.381226	0.430688	0.0535092	0.332311	0.0678013	0.123887	0.0718041	0.0596549	0.283858	0.953899	0.67335	0.179982	0.388341	0.348996	0.127371	0.0915101	0.427384	0.47536	0.135438	0.694518	0.264289	0.714548	0.516837	0.0707888	0.341396	0.167617	0.0517547	0.0589742	0.425556	0.335013	0.243136	0.897926	0.178733	0.264821	0.241302	0.295901	0.132856	0.391705	0.192875	0.277564	0.297021	0.278138	0.599662	0.50309	0.203708
k18	3.94047	4.85773	2.77836	8.83458	1.33984	1.32607	4.92877	6.09403	6.06149	4.9744	1.25955	1.19128	9.35007	3.04109	1.69508	5.77273	1.03796	3.72657	7.0298	4.75697	4.78894	2.98776	1.48696	7.40751	1.03122	8.40676	3.11226	1.90621	2.78316	6.00757	5.31638	3.86281	1.30496	8.83174	1.90752	2.45886	4.75224	2.05562	1	2.39067	5.76337	9.73987	3.2604	5.96089	8.06802	2.11289	3.35237	5.31106	4.50017
k19	8.05215	100	2.20816	2.1579	0.115615	7.88173	12.0974	23.3704	0.885019	7.25734	1.76082	0.173505	0.174276	8.51031	3.34133	0.486615	2.77515	0.964288	28.0233	14.658	12.7649	4.29519	0.412392	0.122261	0.233295	0.102524	10.9204	0.285319	2.40479	0.574409	2.4415	24.7513	1.76633	56.9948	17.8246	9.27405	88.0763	1.05684	5.64842	0.462486	9.60471	0.557061	8.34094	0.182968	0.690478	0.891092	0.777578	1.24038	0.130049
k20	19.7698	56.2613	37.0448	64.0899	31.9827	69.9814	62.9634	59.9107	29.6226	15.1968	31.2421	14.8864	66.2574	38.958	42.3689	24.4836	14.9913	23.2576	19.1656	48.4608	32.4407	20.7798	32.5486	50.5754	21.6692	36.0209	25.3913	14.9929	31.706	23.3565	69.9925	20.9903	43.8152	70.004	22.48	58.0616	45.6579	41.9113	71.0893	53.6876	35.0809	22.0518	37.9112	14	17.3744	56.5505	28.7524	29.1358	14.6829
k21	7.24865	30.5367	88.791	11.0621	0.117405	1.53965	92.0405	1.8524	3.99383	13.6689	25.457	1.58353	22.0617	0.311184	22.8911	2.58552	51.89	1.42352	3.77672	0.194988	12.591	2.62201	39.0484	3.12351	0.200524	1.66484	48.6123	51.5819	1.45491	14.8004	8.47173	0.676038	11.8742	64.5435	0.235435	1.60615	11.6693	8.2885	0.27367	26.4159	1.93498	20.1659	23.8424	0.318124	0.725944	2.60808	42.1185	0.872726	25.5713
k22	0.0267603	0.364485	0.236534	0.186272	0.754934	0.102522	0.163145	0.0163329	0.0268221	0.99801	0.0615678	0.108878	0.201464	0.234231	0.033655	0.787478	0.0216139	0.984124	0.997758	0.199951	0.035992	0.231706	0.0291624	0.17143	0.124259	0.219787	0.0825819	0.672507	0.458444	0.0316209	0.0442132	0.01397	0.599931	0.0178325	0.281927	0.9634	0.202176	0.28459	0.206554	0.794982	0.335244	0.811391	0.072092	0.0195998	0.193608	0.491711	0.626151	0.0499221	0.850974
k23	2.15015	1.17744	1.782	1.06074	2.14614	1.39283	0.776557	4.98229	0.477089	0.544241	0.548252	0.630709	5	4.98501	2.14382	1.6773	2.04212	0.394624	0.254691	0.755766	1.67627	1.41734	1.77416	3.17003	5	3.65695	1.12075	0.926452	3.99087	0.781116	1.07502	0.346241	2.93817	4.78551	0.958867	2.19517	1.09662	1.87558	1.70089	1.10248	0.391254	1.42183	1.72981	1.64575	4.45375	1.60241	4.35868	3.06913	1.48604
k24	0.212593	0.0489397	0.0358181	0.043147	0.0421463	0.00212766	0.00106222	0.0240695	0.00583877	0.00204594	0.062817	0.00222532	0.217691	0.00155834	0.00131331	0.0907217	0.0435019	0.00121585	0.00176887	0.0105873	0.00804126	0.00259898	0.0427269	0.00727369	0.0480023	0.0018054	0.0740125	0.00172118	0.00382047	0.0166845	0.702549	0.0369346	0.326746	0.98318	0.0684236	0.947355	0.0633924	0.172723	0.0465712	0.106832	0.00320269	0.00936939	0.071376	0.00280803	0.702109	0.143279	0.00314237	0.0651513	0.00122914
k25	3.98006	0.289009	0.527084	2.7194	4.9019	0.54445	0.409137	0.713008	2.43227	4.98897	1.35741	0.123802	0.307145	1.94812	2.66345	4.63525	0.948759	0.868069	0.997058	2.21232	2.62396	1.74751	0.722013	0.604596	4.3711	0.459259	1.66524	0.314329	0.317449	1.35538	2.48936	0.11384	2.83402	0.976265	1.92064	0.16222	1.96869	2.64441	4.99173	0.721133	0.352106	3.95984	3.87673	1.19526	1.12817	3.94977	4.52484	2.92187	0.925723
k26	0.1452	4.68347	0.347117	0.423266	3.95953	6.75869	0.404469	0.947665	3.91362	0.201731	0.182188	0.14161	0.353904	0.5164	31.062	14.8513	0.163671	0.187841	1.13458	22.4062	19.7854	1.00562	3.01438	8.00865	0.249762	0.494938	2.66731	0.113309	0.303374	2.79075	0.110731	0.450537	0.908826	0.701267	0.493686	0.113954	0.510667	1.43261	0.1	0.262379	0.17592	14.0029	1.70111	6.76496	0.351532	9.77643	0.569597	0.849319	0.102723
k27	0.731006	0.190005	0.228901	0.4893	0.296026	0.171465	0.440013	0.180011	0.218616	0.107295	0.182741	0.122448	0.18398	0.176145	0.111037	0.162466	0.216327	0.122392	0.169242	0.169065	0.377886	0.166151	0.240324	0.100929	0.2669	0.228959	0.267587	0.327951	0.218098	0.188309	0.190713	0.133793	0.200159	0.157757	0.230517	0.351591	0.119804	0.219179	0.223162	0.156629	0.415434	0.202965	0.13697	0.111212	0.133279	0.158151	0.406492	0.182311	0.107426
k28	12.6295	19.6029	8.83892	23.6074	14.2742	9.85085	16.4765	7.29766	10.5785	7.57774	8.10851	18.7696	8.00037	18.1248	18.1788	11.4438	7.22029	14.7526	19.8913	12.5652	13.7368	11.7967	12.9935	7.04249	11.188	15.7134	13.0856	18.1238	16.327	20.5938	15.828	13.3217	20.3702	15.0529	14.3062	14.9003	24.5909	16.2349	11.7008	16.4382	16.284	14.3121	14.492	11.9595	14.1397	21.887	17.1813	20.2958	23.3767
k29	0.00162988	0.00294318	0.0030574	0.00347607	0.00882907	0.00165001	0.00195742	0.001	0.00197312	0.00405328	0.00372458	0.00398524	0.001	0.00145586	0.00406585	0.00209874	0.00103398	0.00198895	0.001	0.00138745	0.0012589	0.00504157	0.00227079	0.00125163	0.00110029	0.0039705	0.00157992	0.00149683	0.00182288	0.00276932	0.00275581	0.00100968	0.00328443	0.00817211	0.00132229	0.00119504	0.00302816	0.00167941	0.00207626	0.00295432	0.00172327	0.00267261	0.00254342	0.001	0.00200653	0.00393743	0.0024235	0.00348298	0.00102409
k30	16.5655	31.6588	18.351	14.9215	44.024	23.3287	23.908	22.9098	28.9939	11.7262	32.9893	33.8654	12.5288	41.5057	23.7231	44.9785	10.2339	22.45	18.1415	36.4148	15.6455	18.9596	14.3742	21.0924	45	22.4983	27.5803	13.766	10.9514	28.1197	33.5387	17.5133	31.9458	12.5032	27.0334	43.5416	17.7243	25.9171	36.6434	30.7009	29.1576	20.6243	23.6528	22.1262	27.4801	22.3328	36.6142	14.7071	14.5709
k31	4.46011	14.1512	12.0342	9.85248	17.9544	7.71332	3.50587	5.07505	18	18	3.64063	9.19523	8.3034	7.76086	8.48488	4.2274	9.4577	18	17.2473	17.7236	6.08646	17.019	12.6631	18	11.4229	16.8269	5.83171	17.9713	8.833	17.9641	13.6029	12.1704	12.12	12.7254	7.36855	10.6936	17.3117	6.6716	9.23248	8.08598	12.0699	6.84399	7.92868	12.9602	12.8939	7.99368	6.43098	18	5.17574
k32	7.13008	13.456	4.22358	7.91983	4.25504	12.8581	14.8284	8.86217	8.61414	4	5.40823	4.0064	4.91359	14.3254	4.0031	10.5108	5.81214	4	6.61884	6.31868	8.54908	4.3715	4.21967	15.3522	6.52119	4.7458	11.1746	13.4076	8.40538	6.11617	5.72574	9.10428	6.70523	4.30182	10.5182	14.623	7.13884	7.43165	5.27442	7.78333	8.18859	8.53467	9.27093	4.89598	4.55959	16.5834	7.57077	6.7454	4
k33	-	-	-	-	-	-	-	-	-	-	-	-	-	-	-	-	-	-	-	-	-	-	-	-	-	-	-	-	-	-	-	-	-	-	-	-	-	-	-	-	-	-	-	-	-	-	-	-	-
k34	-	-	-	-	-	-	-	-	-	-	-	-	-	-	-	-	-	-	-	-	-	-	-	-	-	-	-	-	-	-	-	-	-	-	-	-	-	-	-	-	-	-	-	-	-	-	-	-	-
k35	-	-	-	-	-	-	-	-	-	-	-	-	-	-	-	-	-	-	-	-	-	-	-	-	-	-	-	-	-	-	-	-	-	-	-	-	-	-	-	-	-	-	-	-	-	-	-	-	-
k36	-	-	-	-	-	-	-	-	-	-	-	-	-	-	-	-	-	-	-	-	-	-	-	-	-	-	-	-	-	-	-	-	-	-	-	-	-	-	-	-	-	-	-	-	-	-	-	-	-
k37	-	-	-	-	-	-	-	-	-	-	-	-	-	-	-	-	-	-	-	-	-	-	-	-	-	-	-	-	-	-	-	-	-	-	-	-	-	-	-	-	-	-	-	-	-	-	-	-	-
k38	-	-	-	-	-	-	-	-	-	-	-	-	-	-	-	-	-	-	-	-	-	-	-	-	-	-	-	-	-	-	-	-	-	-	-	-	-	-	-	-	-	-	-	-	-	-	-	-	-
k39	-	-	-	-	-	-	-	-	-	-	-	-	-	-	-	-	-	-	-	-	-	-	-	-	-	-	-	-	-	-	-	-	-	-	-	-	-	-	-	-	-	-	-	-	-	-	-	-	-
k40	-	-	-	-	-	-	-	-	-	-	-	-	-	-	-	-	-	-	-	-	-	-	-	-	-	-	-	-	-	-	-	-	-	-	-	-	-	-	-	-	-	-	-	-	-	-	-	-	-
k41	-	-	-	-	-	-	-	-	-	-	-	-	-	-	-	-	-	-	-	-	-	-	-	-	-	-	-	-	-	-	-	-	-	-	-	-	-	-	-	-	-	-	-	-	-	-	-	-	-
k42	0.00133508	0.00139546	0.00133747	0.00133429	0.00133585	0.00136108	0.00134228	0.0013376	0.0013384	0.00129066	0.00133489	0.0013342	0.00133782	0.00133528	0.00135072	0.00133402	0.00133544	0.00133233	0.00133601	0.00134941	0.0013488	0.00133417	0.00134734	0.00135989	0.00133511	0.00133679	0.00134989	0.00133375	0.00133647	0.00134093	0.00133487	0.00134619	0.00133532	0.00134075	0.00133556	0.00133721	0.00133622	0.00133607	0.00133541	0.00133363	0.00132636	0.00133482	0.00133602	0.00134276	0.00133527	0.00133526	0.00133494	0.0013357	0.00132114
k43	0.0839497	0.0950604	0.335751	0.0482591	0.0489333	0.150696	0.214001	0.113013	0.0584556	0.0343809	0.92136	0.887657	0.480311	0.174451	0.100766	0.518929	0.574138	0.899191	0.839446	0.463554	0.324419	0.482406	0.638831	0.0505234	0.190011	0.136603	0.540873	0.584113	0.0927916	0.164164	0.0335106	0.247015	0.144577	0.0423255	0.181511	0.59835	0.281572	0.396246	0.114431	0.0445711	0.157833	0.890518	0.326143	0.459458	0.0710141	0.409523	0.99711	0.24938	0.544789
k44	27.5668	10.2879	12.6056	20.3447	37.1615	29.4151	28.4447	17.0867	21.9973	39.8954	18.5547	35.4792	28.0983	18.7292	11.8963	13.2441	14.7024	9.30405	10.3862	14.3569	16.0571	24.1956	28.0585	7.94763	8.72477	12.3927	23.4613	15.6553	15.131	16.7369	7.77752	8.11531	29.4805	8.29496	9.11874	38.0105	15.7742	11.8025	11.9497	29.1162	22.2023	31.0135	16.2249	11.2321	14.5526	11.6171	24.942	14.6774	7.54195
k45	1.28764	6.70718	5.01223	1.06412	1.02968	2.08194	4.76196	2.76898	2.01634	9.81321	1.28944	2.04327	7.6377	1.46273	3.24404	2.50524	1.0055	1.25802	2.18075	1.57119	2.47193	8.58218	2.07153	4.76815	6.90697	1.53072	3.41326	1.80596	1.77749	4.00318	2.41904	1.4344	6.64214	9.17792	2.93774	9.21877	7.44304	5.63978	1.67859	1.76909	2.2841	4.29323	4.64125	3.08998	1.4579	2.91816	2.04101	2.19184	1.03125
k46	7.99621	11.407	4.04163	19.0086	4.28521	3.52845	2.68914	9.37975	7.13873	11.3358	6.47627	9.88822	7.69432	3.37384	19.4722	2.69522	2.38325	2.98883	8.52138	7.56494	8.12166	18.1216	2.50736	2.2684	7.53969	8.85812	5.62373	2.55826	6.07294	3.80526	3.97179	11.2095	4.43025	17.9446	9.253	3.80345	4.83935	6.54631	14.3425	11.8215	10.2832	13.0489	5.81679	17.9819	6.60395	9.08729	11.1069	6.56981	8.75091
k47	0.227887	0.89931	0.198535	0.0391777	0.326346	0.0347945	0.693429	0.145941	0.0840163	0.912257	0.165006	0.295683	0.962727	0.211242	0.0605203	0.287537	0.08992	0.0335393	0.0744053	0.280182	0.0392386	0.192941	0.0591105	0.0465777	0.275206	0.22881	0.0852398	0.085317	0.100379	0.12398	0.655745	0.154826	0.431849	0.908214	0.119477	0.113056	0.18307	0.506029	0.032025	0.206971	0.188742	0.914462	0.0810855	0.677302	0.129418	0.0963667	0.413427	0.441341	0.812744
k48	21.9114	48.772	13.1359	25.8754	48.5655	49.9233	10.5049	23.1825	15.1123	30.4008	7.85818	10.517	5.84865	36.3122	5.87288	39.5576	6.62873	12.2959	35.732	21.1485	13.6115	7.18061	28.2132	7.25714	36.2975	20.0529	16.3338	15.2176	8.86056	15.4196	15.4448	35.9791	18.6074	43.3516	21.2023	48.8425	30.2539	16.301	21.9023	16.423	22.6533	21.6747	36.0647	16.7234	13.2595	32.0273	43.2486	28.4731	45.0714
k49	0.8714	3.99621	0.211853	0.178068	0.795413	0.186839	5.6169	9.99222	1.93782	1.63672	0.579375	1.96582	19.9677	0.141849	3.72472	0.583106	0.621278	0.127557	0.586436	10.9161	4.70876	4.79578	4.98855	4.62804	9.30877	0.105858	4.84244	0.568626	1.58573	1.28126	1.69596	0.367521	0.247234	0.207384	0.400966	19.2479	2.72355	2.56601	6.0482	3.08717	0.946052	7.08929	3.20765	19.8807	8.70421	0.832334	0.268106	0.177317	0.128473
k50	5.76026	1.00001	4.89011	1.42087	8.26243	2.83142	4.14318	2.17913	4.07638	16	8.15671	1.99423	8.26509	2.69636	15.2121	3.14962	6.23974	1.10421	7.25002	1.02156	3.53655	8.22934	2.0769	5.71842	1.87143	14.6107	2.16382	14.2773	7.77355	1.99821	1.60002	3.50383	4.2506	15.7435	4.57786	15.4173	2.55858	5.4991	7.29556	1.59763	7.16155	2.74853	3.68318	2.43689	5.85415	9.6946	13.0152	6.42863	1.04101
k51	7.11868	42.2116	13.0545	19.5969	71.7051	60.5851	66.3778	69.7269	18.6262	59.5326	17.8284	15.8928	74.2883	73.678	71.5258	20.3151	14.4533	4.72062	4	31.9927	24.8318	30.1996	40.9978	67.504	74.8184	39.8027	19.4994	10.7036	19.1092	21.5038	18.4069	5.2876	49.4312	71.014	28.5465	38.4262	10.7412	13.0986	29.1712	44.8208	16.3094	14.9839	60.1906	46.7796	60.523	28.9718	30.9768	53.0813	69.3396
k52	15	15	15	15	15	15	15	15	15	15	15	15	15	15	15	15	15	15	15	15	15	15	15	15	15	15	15	15	15	15	15	15	15	15	15	15	15	15	15	15	15	15	15	15	15	15	15	15	15
k53	9.63377	73.2341	28.1744	30.2276	10.8376	33.0563	33.3166	15.3276	46.647	4.92381	43.0195	12.7097	25.485	22.7897	71.8669	42.8464	29.4098	4.88404	74.6795	50.5923	22.9057	46.9685	5.60155	17.8391	18.0879	14.4228	25.0202	4.41304	19.0621	14.838	33.5651	16.7503	64.9988	69.0152	21.1897	73.4812	24.0052	21.2041	6.01696	13.4507	10.4112	20.3603	18.1055	8.75644	52.8213	64.9392	27.7219	11.0763	16.2726
k54	0.0544628	0.321566	0.0755982	5.20307	0.176397	0.180251	2.19472	0.28918	0.102462	31.465	2.47386	0.531681	0.42816	0.101541	0.353188	0.474693	0.611315	0.0425632	0.0411774	0.0729771	0.044697	2.81777	0.0346972	0.053854	0.42999	0.0849665	0.26589	0.0426686	0.115484	0.264061	0.0417305	0.0515388	0.842541	6.01204	0.209913	0.670945	0.0635572	0.042513	0.22657	0.716757	0.429373	0.144678	0.19327	0.134626	2.17935	1.39455	0.501907	0.108447	32.7354
k55	1.54089	0.133375	3.56991	5.12064	68.4665	0.253756	1.55553	7.39196	0.153416	8.8158	0.379138	0.854899	81.9291	0.105032	21.6331	0.485826	0.109039	0.528851	0.904167	13.4569	1.27935	5.59297	0.61972	5.40512	0.407542	0.672339	1.60862	3.50029	8.71311	2.40209	2.7008	0.129761	60.489	0.144835	11.4083	18.7887	8.11036	5.29366	1.98577	21.5171	4.4211	0.519743	3.28224	14.5014	65.4637	22.437	97.7795	0.39682	0.362809
k56	9.22043	8.55456	4.4585	72.0472	68.2177	2.6559	39.0074	1.91175	8.99184	52.5187	16.0987	12.088	18.8171	1.09056	13.608	4.96224	0.904777	2.65934	7.28773	59.5541	3.72847	2.216	5.07979	1.64168	1.07275	0.588369	1.76985	25.832	5.11689	19.3006	67.8527	4.01505	40.225	1.51646	19.3214	13.2807	23.8657	11.1614	1.89767	27.9848	26.3241	5.29963	9.74534	5.60359	23.4026	48.1713	30.9878	0.64639	1.23897
k57	50.6616	50.7478	31.7939	60.3564	46.7559	61.8018	34.1859	24.0827	50.0526	46.9173	73.2734	30.2656	21.4417	72.2897	66.0446	30.0187	34.7445	67.286	50.203	28.997	61.0159	38.6872	23.3107	50.2141	20.0628	51.3986	51.1448	26.9891	30.1904	58.4814	51.9292	29.5604	42.9104	27.6868	38.396	88.3172	35.7294	39.7622	23.6031	41.1537	52.2082	87.6564	32.407	23.3464	24.6989	51.5785	48.8059	37.2358	20.9748
k58	0.0673554	0.0444386	0.0983849	0.0254465	0.127075	0.143563	0.0178364	0.11077	0.0226004	0.0412958	0.0239347	0.019885	0.0946192	0.317966	0.22445	0.0599941	0.129447	0.116332	0.0424571	0.0305034	0.142461	0.158453	0.0451461	0.231506	0.0880964	0.238183	0.172279	0.0235963	0.113799	0.0558723	0.0172516	0.0196581	0.141852	0.111671	0.0810452	0.299309	0.0595775	0.0882738	0.0804339	0.0986337	0.0442852	0.130568	0.0642917	0.0925212	0.099007	0.0927126	0.199887	0.167697	0.0679027
k59	3.94047	4.85773	2.77836	8.83458	1.33984	1.32607	4.92877	6.09403	6.06149	4.9744	1.25955	1.19128	9.35007	3.04109	1.69508	5.77273	1.03796	3.72657	7.0298	4.75697	4.78894	2.98776	1.48696	7.40751	1.03122	8.40676	3.11226	1.90621	2.78316	6.00757	5.31638	3.86281	1.30496	8.83174	1.90752	2.45886	4.75224	2.05562	1	2.39067	5.76337	9.73987	3.2604	5.96089	8.06802	2.11289	3.35237	5.31106	4.50017
k60	8.05215	100	2.20816	2.1579	0.115615	7.88173	12.0974	23.3704	0.885019	7.25734	1.76082	0.173505	0.174276	8.51031	3.34133	0.486615	2.77515	0.964288	28.0233	14.658	12.7649	4.29519	0.412392	0.122261	0.233295	0.102524	10.9204	0.285319	2.40479	0.574409	2.4415	24.7513	1.76633	56.9948	17.8246	9.27405	88.0763	1.05684	5.64842	0.462486	9.60471	0.557061	8.34094	0.182968	0.690478	0.891092	0.777578	1.24038	0.130049
k61	19.7698	56.2613	37.0448	64.0899	31.9827	69.9814	62.9634	59.9107	29.6226	15.1968	31.2421	14.8864	66.2574	38.958	42.3689	24.4836	14.9913	23.2576	19.1656	48.4608	32.4407	20.7798	32.5486	50.5754	21.6692	36.0209	25.3913	14.9929	31.706	23.3565	69.9925	20.9903	43.8152	70.004	22.48	58.0616	45.6579	41.9113	71.0893	53.6876	35.0809	22.0518	37.9112	14	17.3744	56.5505	28.7524	29.1358	14.6829
k62	2.41622	10.1789	29.597	3.68738	0.0391349	0.513215	30.6802	0.617465	1.33128	4.55629	8.48567	0.527843	7.35391	0.103728	7.63038	0.861841	17.2967	0.474506	1.25891	0.0649961	4.19701	0.874003	13.0161	1.04117	0.0668412	0.554946	16.2041	17.194	0.484971	4.93346	2.82391	0.225346	3.95805	21.5145	0.0784783	0.535385	3.88977	2.76283	0.0912233	8.80529	0.644994	6.72196	7.94748	0.106041	0.241981	0.869359	14.0395	0.290909	8.52376
k63	0.0267603	0.364485	0.236534	0.186272	0.754934	0.102522	0.163145	0.0163329	0.0268221	0.99801	0.0615678	0.108878	0.201464	0.234231	0.033655	0.787478	0.0216139	0.984124	0.997758	0.199951	0.035992	0.231706	0.0291624	0.17143	0.124259	0.219787	0.0825819	0.672507	0.458444	0.0316209	0.0442132	0.01397	0.599931	0.0178325	0.281927	0.9634	0.202176	0.28459	0.206554	0.794982	0.335244	0.811391	0.072092	0.0195998	0.193608	0.491711	0.626151	0.0499221	0.850974
k64	2.15015	1.17744	1.782	1.06074	2.14614	1.39283	0.776557	4.98229	0.477089	0.544241	0.548252	0.630709	5	4.98501	2.14382	1.6773	2.04212	0.394624	0.254691	0.755766	1.67627	1.41734	1.77416	3.17003	5	3.65695	1.12075	0.926452	3.99087	0.781116	1.07502	0.346241	2.93817	4.78551	0.958867	2.19517	1.09662	1.87558	1.70089	1.10248	0.391254	1.42183	1.72981	1.64575	4.45375	1.60241	4.35868	3.06913	1.48604
k65	0.212593	0.0489397	0.0358181	0.043147	0.0421463	0.00212766	0.00106222	0.0240695	0.00583877	0.00204594	0.062817	0.00222532	0.217691	0.00155834	0.00131331	0.0907217	0.0435019	0.00121585	0.00176887	0.0105873	0.00804126	0.00259898	0.0427269	0.00727369	0.0480023	0.0018054	0.0740125	0.00172118	0.00382047	0.0166845	0.702549	0.0369346	0.326746	0.98318	0.0684236	0.947355	0.0633924	0.172723	0.0465712	0.106832	0.00320269	0.00936939	0.071376	0.00280803	0.702109	0.143279	0.00314237	0.0651513	0.00122914
k66	3.98006	0.289009	0.527084	2.7194	4.9019	0.54445	0.409137	0.713008	2.43227	4.98897	1.35741	0.123802	0.307145	1.94812	2.66345	4.63525	0.948759	0.868069	0.997058	2.21232	2.62396	1.74751	0.722013	0.604596	4.3711	0.459259	1.66524	0.314329	0.317449	1.35538	2.48936	0.11384	2.83402	0.976265	1.92064	0.16222	1.96869	2.64441	4.99173	0.721133	0.352106	3.95984	3.87673	1.19526	1.12817	3.94977	4.52484	2.92187	0.925723
k67	0.1452	4.68347	0.347117	0.423266	3.95953	6.75869	0.404469	0.947665	3.91362	0.201731	0.182188	0.14161	0.353904	0.5164	31.062	14.8513	0.163671	0.187841	1.13458	22.4062	19.7854	1.00562	3.01438	8.00865	0.249762	0.494938	2.66731	0.113309	0.303374	2.79075	0.110731	0.450537	0.908826	0.701267	0.493686	0.113954	0.510667	1.43261	0.1	0.262379	0.17592	14.0029	1.70111	6.76496	0.351532	9.77643	0.569597	0.849319	0.102723
k68	0.731006	0.190005	0.228901	0.4893	0.296026	0.171465	0.440013	0.180011	0.218616	0.107295	0.182741	0.122448	0.18398	0.176145	0.111037	0.162466	0.216327	0.122392	0.169242	0.169065	0.377886	0.166151	0.240324	0.100929	0.2669	0.228959	0.267587	0.327951	0.218098	0.188309	0.190713	0.133793	0.200159	0.157757	0.230517	0.351591	0.119804	0.219179	0.223162	0.156629	0.415434	0.202965	0.13697	0.111212	0.133279	0.158151	0.406492	0.182311	0.107426
k69	12.6295	19.6029	8.83892	23.6074	14.2742	9.85085	16.4765	7.29766	10.5785	7.57774	8.10851	18.7696	8.00037	18.1248	18.1788	11.4438	7.22029	14.7526	19.8913	12.5652	13.7368	11.7967	12.9935	7.04249	11.188	15.7134	13.0856	18.1238	16.327	20.5938	15.828	13.3217	20.3702	15.0529	14.3062	14.9003	24.5909	16.2349	11.7008	16.4382	16.284	14.3121	14.492	11.9595	14.1397	21.887	17.1813	20.2958	23.3767
k70	0.00162988	0.00294318	0.0030574	0.00347607	0.00882907	0.00165001	0.00195742	0.001	0.00197312	0.00405328	0.00372458	0.00398524	0.001	0.00145586	0.00406585	0.00209874	0.00103398	0.00198895	0.001	0.00138745	0.0012589	0.00504157	0.00227079	0.00125163	0.00110029	0.0039705	0.00157992	0.00149683	0.00182288	0.00276932	0.00275581	0.00100968	0.00328443	0.00817211	0.00132229	0.00119504	0.00302816	0.00167941	0.00207626	0.00295432	0.00172327	0.00267261	0.00254342	0.001	0.00200653	0.00393743	0.0024235	0.00348298	0.00102409
k71	16.5655	31.6588	18.351	14.9215	44.024	23.3287	23.908	22.9098	28.9939	11.7262	32.9893	33.8654	12.5288	41.5057	23.7231	44.9785	10.2339	22.45	18.1415	36.4148	15.6455	18.9596	14.3742	21.0924	45	22.4983	27.5803	13.766	10.9514	28.1197	33.5387	17.5133	31.9458	12.5032	27.0334	43.5416	17.7243	25.9171	36.6434	30.7009	29.1576	20.6243	23.6528	22.1262	27.4801	22.3328	36.6142	14.7071	14.5709
k72	4.46011	14.1512	12.0342	9.85248	17.9544	7.71332	3.50587	5.07505	18	18	3.64063	9.19523	8.3034	7.76086	8.48488	4.2274	9.4577	18	17.2473	17.7236	6.08646	17.019	12.6631	18	11.4229	16.8269	5.83171	17.9713	8.833	17.9641	13.6029	12.1704	12.12	12.7254	7.36855	10.6936	17.3117	6.6716	9.23248	8.08598	12.0699	6.84399	7.92868	12.9602	12.8939	7.99368	6.43098	18	5.17574
k73	7.13008	13.456	4.22358	7.91983	4.25504	12.8581	14.8284	8.86217	8.61414	4	5.40823	4.0064	4.91359	14.3254	4.0031	10.5108	5.81214	4	6.61884	6.31868	8.54908	4.3715	4.21967	15.3522	6.52119	4.7458	11.1746	13.4076	8.40538	6.11617	5.72574	9.10428	6.70523	4.30182	10.5182	14.623	7.13884	7.43165	5.27442	7.78333	8.18859	8.53467	9.27093	4.89598	4.55959	16.5834	7.57077	6.7454	4
k74	-	-	-	-	-	-	-	-	-	-	-	-	-	-	-	-	-	-	-	-	-	-	-	-	-	-	-	-	-	-	-	-	-	-	-	-	-	-	-	-	-	-	-	-	-	-	-	-	-
k75	-	-	-	-	-	-	-	-	-	-	-	-	-	-	-	-	-	-	-	-	-	-	-	-	-	-	-	-	-	-	-	-	-	-	-	-	-	-	-	-	-	-	-	-	-	-	-	-	-
k76	-	-	-	-	-	-	-	-	-	-	-	-	-	-	-	-	-	-	-	-	-	-	-	-	-	-	-	-	-	-	-	-	-	-	-	-	-	-	-	-	-	-	-	-	-	-	-	-	-
k77	-	-	-	-	-	-	-	-	-	-	-	-	-	-	-	-	-	-	-	-	-	-	-	-	-	-	-	-	-	-	-	-	-	-	-	-	-	-	-	-	-	-	-	-	-	-	-	-	-
k78	-	-	-	-	-	-	-	-	-	-	-	-	-	-	-	-	-	-	-	-	-	-	-	-	-	-	-	-	-	-	-	-	-	-	-	-	-	-	-	-	-	-	-	-	-	-	-	-	-
k79	-	-	-	-	-	-	-	-	-	-	-	-	-	-	-	-	-	-	-	-	-	-	-	-	-	-	-	-	-	-	-	-	-	-	-	-	-	-	-	-	-	-	-	-	-	-	-	-	-
k80	-	-	-	-	-	-	-	-	-	-	-	-	-	-	-	-	-	-	-	-	-	-	-	-	-	-	-	-	-	-	-	-	-	-	-	-	-	-	-	-	-	-	-	-	-	-	-	-	-
k8-	-	-	-	-	-	-	-	-	-	-	-	-	-	-	-	-	-	-	-	-	-	-	-	-	-	-	-	-	-	-	-	-	-	-	-	-	-	-	-	-	-	-	-	-	-	-	-	-	-
k82	-	-	-	-	-	-	-	-	-	-	-	-	-	-	-	-	-	-	-	-	-	-	-	-	-	-	-	-	-	-	-	-	-	-	-	-	-	-	-	-	-	-	-	-	-	-	-	-	-
k83	-	-	-	-	-	-	-	-	-	-	-	-	-	-	-	-	-	-	-	-	-	-	-	-	-	-	-	-	-	-	-	-	-	-	-	-	-	-	-	-	-	-	-	-	-	-	-	-	-
k84	0.68	0.68	0.68	0.68	0.68	0.68	0.68	0.68	0.68	0.68	0.68	0.68	0.68	0.68	0.68	0.68	0.68	0.68	0.68	0.68	0.68	0.68	0.68	0.68	0.68	0.68	0.68	0.68	0.68	0.68	0.68	0.68	0.68	0.68	0.68	0.68	0.68	0.68	0.68	0.68	0.68	0.68	0.68	0.68	0.68	0.68	0.68	0.68	0.68
k85	0.0153172	0.0866514	0.0847651	0.00196595	0.0920954	0.00930974	0.0589118	0.0106569	0.0109265	0.0420609	0.00117639	0.0030952	0.00219263	0.00105533	0.0179447	0.00394819	0.00286275	0.0331978	0.0657599	0.00144088	0.0141375	0.00685944	0.0757916	0.00113731	0.097367	0.0175154	0.0380578	0.0954016	0.1	0.0302591	0.0188285	0.00134152	0.0316529	0.0763379	0.00384225	0.00373971	0.0529196	0.00509313	0.0986351	0.0032315	0.00283818	0.0567956	0.00206681	0.0964518	0.093871	0.00838079	0.012616	0.00585799	0.0014532
k86	5e-06	5e-06	5e-06	5e-06	5e-06	5e-06	5e-06	5e-06	5e-06	5e-06	5e-06	5e-06	5e-06	5e-06	5e-06	5e-06	5e-06	5e-06	5e-06	5e-06	5e-06	5e-06	5e-06	5e-06	5e-06	5e-06	5e-06	5e-06	5e-06	5e-06	5e-06	5e-06	5e-06	5e-06	5e-06	5e-06	5e-06	5e-06	5e-06	5e-06	5e-06	5e-06	5e-06	5e-06	5e-06	5e-06	5e-06	5e-06	5e-06
k87	0.0012	0.0012	0.0012	0.0012	0.0012	0.0012	0.0012	0.0012	0.0012	0.0012	0.0012	0.0012	0.0012	0.0012	0.0012	0.0012	0.0012	0.0012	0.0012	0.0012	0.0012	0.0012	0.0012	0.0012	0.0012	0.0012	0.0012	0.0012	0.0012	0.0012	0.0012	0.0012	0.0012	0.0012	0.0012	0.0012	0.0012	0.0012	0.0012	0.0012	0.0012	0.0012	0.0012	0.0012	0.0012	0.0012	0.0012	0.0012	0.0012
k88	5e-06	5e-06	5e-06	5e-06	5e-06	5e-06	5e-06	5e-06	5e-06	5e-06	5e-06	5e-06	5e-06	5e-06	5e-06	5e-06	5e-06	5e-06	5e-06	5e-06	5e-06	5e-06	5e-06	5e-06	5e-06	5e-06	5e-06	5e-06	5e-06	5e-06	5e-06	5e-06	5e-06	5e-06	5e-06	5e-06	5e-06	5e-06	5e-06	5e-06	5e-06	5e-06	5e-06	5e-06	5e-06	5e-06	5e-06	5e-06	5e-06
k89	0.06	0.06	0.06	0.06	0.06	0.06	0.06	0.06	0.06	0.06	0.06	0.06	0.06	0.06	0.06	0.06	0.06	0.06	0.06	0.06	0.06	0.06	0.06	0.06	0.06	0.06	0.06	0.06	0.06	0.06	0.06	0.06	0.06	0.06	0.06	0.06	0.06	0.06	0.06	0.06	0.06	0.06	0.06	0.06	0.06	0.06	0.06	0.06	0.06
k90	0.095	0.095	0.095	0.095	0.095	0.095	0.095	0.095	0.095	0.095	0.095	0.095	0.095	0.095	0.095	0.095	0.095	0.095	0.095	0.095	0.095	0.095	0.095	0.095	0.095	0.095	0.095	0.095	0.095	0.095	0.095	0.095	0.095	0.095	0.095	0.095	0.095	0.095	0.095	0.095	0.095	0.095	0.095	0.095	0.095	0.095	0.095	0.095	0.095
k91	0.00542857	0.00542857	0.00542857	0.00542857	0.00542857	0.00542857	0.00542857	0.00542857	0.00542857	0.00542857	0.00542857	0.00542857	0.00542857	0.00542857	0.00542857	0.00542857	0.00542857	0.00542857	0.00542857	0.00542857	0.00542857	0.00542857	0.00542857	0.00542857	0.00542857	0.00542857	0.00542857	0.00542857	0.00542857	0.00542857	0.00542857	0.00542857	0.00542857	0.00542857	0.00542857	0.00542857	0.00542857	0.00542857	0.00542857	0.00542857	0.00542857	0.00542857	0.00542857	0.00542857	0.00542857	0.00542857	0.00542857	0.00542857	0.00542857
k92	0.095	0.095	0.095	0.095	0.095	0.095	0.095	0.095	0.095	0.095	0.095	0.095	0.095	0.095	0.095	0.095	0.095	0.095	0.095	0.095	0.095	0.095	0.095	0.095	0.095	0.095	0.095	0.095	0.095	0.095	0.095	0.095	0.095	0.095	0.095	0.095	0.095	0.095	0.095	0.095	0.095	0.095	0.095	0.095	0.095	0.095	0.095	0.095	0.095
k93	0.019	0.019	0.019	0.019	0.019	0.019	0.019	0.019	0.019	0.019	0.019	0.019	0.019	0.019	0.019	0.019	0.019	0.019	0.019	0.019	0.019	0.019	0.019	0.019	0.019	0.019	0.019	0.019	0.019	0.019	0.019	0.019	0.019	0.019	0.019	0.019	0.019	0.019	0.019	0.019	0.019	0.019	0.019	0.019	0.019	0.019	0.019	0.019	0.019
[truncated: 2,451 more columns]

## Sheet: DiseaseParams
Table S6. Parameter sets for the aggregation-prone population.
	Run1	Run2	Run3	Run4	Run5	Run6	Run7	Run8	Run9	Run10	Run11	Run12	Run13	Run14	Run15	Run16	Run17	Run18	Run19	Run20	Run21	Run22	Run23	Run24	Run25	Run26	Run27	Run28	Run29	Run30	Run31	Run32	Run33	Run34	Run35	Run36	Run37	Run38	Run39	Run40	Run41	Run42	Run43	Run44	Run45	Run46	Run47	Run48	Run49
k1	0.0372502	0.00157743	0.0137545	0.00739207	0.00683024	0.00735715	0.00697339	0.0020304	0.00239995	0.0559924	0.00382665	0.0115837	0.0417459	0.00133386	0.0530697	0.00121851	0.00146309	0.00778935	0.00572428	0.00236069	0.0126564	0.00818469	0.00149556	0.0775431	0.0269544	0.0038214	0.00855747	0.00581758	0.00504006	0.00186571	0.0039231	0.0190365	0.00462597	0.00115973	0.0129218	0.00250526	0.0329162	0.00147659	0.0277341	0.00415671	0.00127076	0.00143225	0.00899256	0.00874845	0.0469543	0.0930572	0.00168032	0.00591227	0.00649077
k2	0.391818	0.0632313	0.0841535	0.151572	0.53202	0.0534288	0.453939	0.226858	0.0717063	0.618599	0.245317	0.455978	0.0606702	0.0344698	0.0856796	0.0704349	0.371404	0.344958	0.765368	0.48193	0.0367179	0.687931	0.0972607	0.391038	0.251965	0.329283	0.295178	0.355061	0.27771	0.049794	0.0361627	0.745811	0.611055	0.387199	0.228954	0.260425	0.909235	0.814115	0.0381156	0.24897	0.0645114	0.668231	0.125793	0.052212	0.355058	0.985922	0.548301	0.263544	0.0401994
k3	27.5668	10.2879	12.6056	20.3447	37.1615	29.4151	28.4447	17.0867	21.9973	39.8954	18.5547	35.4792	28.0983	18.7292	11.8963	13.2441	14.7024	9.30405	10.3862	14.3569	16.0571	24.1956	28.0585	7.94763	8.72477	12.3927	23.4613	15.6553	15.131	16.7369	7.77752	8.11531	29.4805	8.29496	9.11874	38.0105	15.7742	11.8025	11.9497	29.1162	22.2023	31.0135	16.2249	11.2321	14.5526	11.6171	24.942	14.6774	7.54195
k4	6.066	2.72408	2.05766	6.29902	6.37279	8.33773	2.19565	1.31294	5.88885	5.03918	4.32984	1.26477	5.70521	7.91379	3.19858	4.32745	6.42014	1.63764	1.74749	8.98653	2.25001	1.2162	5.19917	2.39658	4.85746	1.78207	2.64956	3.25854	7.62736	4.26626	6.64673	9.46564	9.33021	3.81564	2.13331	2.20838	9.75704	4.59491	7.48451	7.97257	3.30382	6.04813	4.10892	1.52459	3.46896	5.67422	2.49504	2.62062	6.97682
k5	7.99621	11.407	4.04163	19.0086	4.28521	3.52845	2.68914	9.37975	7.13873	11.3358	6.47627	9.88822	7.69432	3.37384	19.4722	2.69522	2.38325	2.98883	8.52138	7.56494	8.12166	18.1216	2.50736	2.2684	7.53969	8.85812	5.62373	2.55826	6.07294	3.80526	3.97179	11.2095	4.43025	17.9446	9.253	3.80345	4.83935	6.54631	14.3425	11.8215	10.2832	13.0489	5.81679	17.9819	6.60395	9.08729	11.1069	6.56981	8.75091
k6	0.142988	0.341569	0.163922	0.0831298	0.0941024	0.521779	0.176707	0.0471718	0.920033	0.421796	0.663003	0.0402769	0.132908	0.154564	0.336709	0.0416753	0.09775	0.0688698	0.386635	0.412449	0.0350217	0.120291	0.224934	0.942072	0.777071	0.833807	0.420785	0.374013	0.0875145	0.317822	0.0410146	0.763521	0.138224	0.0667475	0.0665291	0.0563259	0.773236	0.0669785	0.330256	0.280332	0.360949	0.0667912	0.117427	0.363515	0.164242	0.0791537	0.330177	0.0912939	0.7887
k7	21.9114	48.772	13.1359	25.8754	48.5655	49.9233	10.5049	23.1825	15.1123	30.4008	7.85818	10.517	5.84865	36.3122	5.87288	39.5576	6.62873	12.2959	35.732	21.1485	13.6115	7.18061	28.2132	7.25714	36.2975	20.0529	16.3338	15.2176	8.86056	15.4196	15.4448	35.9791	18.6074	43.3516	21.2023	48.8425	30.2539	16.301	21.9023	16.423	22.6533	21.6747	36.0647	16.7234	13.2595	32.0273	43.2486	28.4731	45.0714
k8	0.608448	0.151942	0.354699	8.09261	1.3574	0.69736	1.31757	8.43029	5.63082	0.139336	1.44968	5.55296	0.296305	0.493999	3.01359	0.415076	7.13793	0.749233	0.238374	2.12937	0.248907	6.25775	1.37156	5.4474	2.07646	1.11335	0.672854	5.64301	4.06793	6.98733	0.307931	10.7163	4.74568	1.36931	6.26118	1.89915	19.7112	0.815742	10.9278	0.352767	0.599534	3.18769	2.4011	0.273588	0.793796	0.105103	0.31377	8.42051	0.240928
k9	5.76026	1.00001	4.89011	1.42087	8.26243	2.83142	4.14318	2.17913	4.07638	16	8.15671	1.99423	8.26509	2.69636	15.2121	3.14962	6.23974	1.10421	7.25002	1.02156	3.53655	8.22934	2.0769	5.71842	1.87143	14.6107	2.16382	14.2773	7.77355	1.99821	1.60002	3.50383	4.2506	15.7435	4.57786	15.4173	2.55858	5.4991	7.29556	1.59763	7.16155	2.74853	3.68318	2.43689	5.85415	9.6946	13.0152	6.42863	1.04101
k10	7.11868	42.2116	13.0545	19.5969	71.7051	60.5851	66.3778	69.7269	18.6262	59.5326	17.8284	15.8928	74.2883	73.678	71.5258	20.3151	14.4533	4.72062	4	31.9927	24.8318	30.1996	40.9978	67.504	74.8184	39.8027	19.4994	10.7036	19.1092	21.5038	18.4069	5.2876	49.4312	71.014	28.5465	38.4262	10.7412	13.0986	29.1712	44.8208	16.3094	14.9839	60.1906	46.7796	60.523	28.9718	30.9768	53.0813	69.3396
k11	15	15	15	15	15	15	15	15	15	15	15	15	15	15	15	15	15	15	15	15	15	15	15	15	15	15	15	15	15	15	15	15	15	15	15	15	15	15	15	15	15	15	15	15	15	15	15	15	15
k12	9.63377	73.2341	28.1744	30.2276	10.8376	33.0563	33.3166	15.3276	46.647	4.92381	43.0195	12.7097	25.485	22.7897	71.8669	42.8464	29.4098	4.88404	74.6795	50.5923	22.9057	46.9685	5.60155	17.8391	18.0879	14.4228	25.0202	4.41304	19.0621	14.838	33.5651	16.7503	64.9988	69.0152	21.1897	73.4812	24.0052	21.2041	6.01696	13.4507	10.4112	20.3603	18.1055	8.75644	52.8213	64.9392	27.7219	11.0763	16.2726
k13	0.163388	0.964698	0.226795	15.6092	0.52919	0.540753	6.58415	0.86754	0.307387	94.3951	7.42157	1.59504	1.28448	0.304624	1.05956	1.42408	1.83395	0.12769	0.123532	0.218931	0.134091	8.4533	0.104092	0.161562	1.28997	0.2549	0.79767	0.128006	0.346453	0.792184	0.125191	0.154616	2.52762	18.0361	0.62974	2.01284	0.190672	0.127539	0.679709	2.15027	1.28812	0.434035	0.579809	0.403878	6.53805	4.18366	1.50572	0.32534	98.2061
k14	1.54089	0.133375	3.56991	5.12064	68.4665	0.253756	1.55553	7.39196	0.153416	8.8158	0.379138	0.854899	81.9291	0.105032	21.6331	0.485826	0.109039	0.528851	0.904167	13.4569	1.27935	5.59297	0.61972	5.40512	0.407542	0.672339	1.60862	3.50029	8.71311	2.40209	2.7008	0.129761	60.489	0.144835	11.4083	18.7887	8.11036	5.29366	1.98577	21.5171	4.4211	0.519743	3.28224	14.5014	65.4637	22.437	97.7795	0.39682	0.362809
k15	9.22043	8.55456	4.4585	72.0472	68.2177	2.6559	39.0074	1.91175	8.99184	52.5187	16.0987	12.088	18.8171	1.09056	13.608	4.96224	0.904777	2.65934	7.28773	59.5541	3.72847	2.216	5.07979	1.64168	1.07275	0.588369	1.76985	25.832	5.11689	19.3006	67.8527	4.01505	40.225	1.51646	19.3214	13.2807	23.8657	11.1614	1.89767	27.9848	26.3241	5.29963	9.74534	5.60359	23.4026	48.1713	30.9878	0.64639	1.23897
k16	50.6616	50.7478	31.7939	60.3564	46.7559	61.8018	34.1859	24.0827	50.0526	46.9173	73.2734	30.2656	21.4417	72.2897	66.0446	30.0187	34.7445	67.286	50.203	28.997	61.0159	38.6872	23.3107	50.2141	20.0628	51.3986	51.1448	26.9891	30.1904	58.4814	51.9292	29.5604	42.9104	27.6868	38.396	88.3172	35.7294	39.7622	23.6031	41.1537	52.2082	87.6564	32.407	23.3464	24.6989	51.5785	48.8059	37.2358	20.9748
k17	0.202066	0.133316	0.295155	0.0763396	0.381226	0.430688	0.0535092	0.332311	0.0678013	0.123887	0.0718041	0.0596549	0.283858	0.953899	0.67335	0.179982	0.388341	0.348996	0.127371	0.0915101	0.427384	0.47536	0.135438	0.694518	0.264289	0.714548	0.516837	0.0707888	0.341396	0.167617	0.0517547	0.0589742	0.425556	0.335013	0.243136	0.897926	0.178733	0.264821	0.241302	0.295901	0.132856	0.391705	0.192875	0.277564	0.297021	0.278138	0.599662	0.50309	0.203708
k18	3.94047	4.85773	2.77836	8.83458	1.33984	1.32607	4.92877	6.09403	6.06149	4.9744	1.25955	1.19128	9.35007	3.04109	1.69508	5.77273	1.03796	3.72657	7.0298	4.75697	4.78894	2.98776	1.48696	7.40751	1.03122	8.40676	3.11226	1.90621	2.78316	6.00757	5.31638	3.86281	1.30496	8.83174	1.90752	2.45886	4.75224	2.05562	1	2.39067	5.76337	9.73987	3.2604	5.96089	8.06802	2.11289	3.35237	5.31106	4.50017
k19	8.05215	100	2.20816	2.1579	0.115615	7.88173	12.0974	23.3704	0.885019	7.25734	1.76082	0.173505	0.174276	8.51031	3.34133	0.486615	2.77515	0.964288	28.0233	14.658	12.7649	4.29519	0.412392	0.122261	0.233295	0.102524	10.9204	0.285319	2.40479	0.574409	2.4415	24.7513	1.76633	56.9948	17.8246	9.27405	88.0763	1.05684	5.64842	0.462486	9.60471	0.557061	8.34094	0.182968	0.690478	0.891092	0.777578	1.24038	0.130049
k20	19.7698	56.2613	37.0448	64.0899	31.9827	69.9814	62.9634	59.9107	29.6226	15.1968	31.2421	14.8864	66.2574	38.958	42.3689	24.4836	14.9913	23.2576	19.1656	48.4608	32.4407	20.7798	32.5486	50.5754	21.6692	36.0209	25.3913	14.9929	31.706	23.3565	69.9925	20.9903	43.8152	70.004	22.48	58.0616	45.6579	41.9113	71.0893	53.6876	35.0809	22.0518	37.9112	14	17.3744	56.5505	28.7524	29.1358	14.6829
k21	7.24865	30.5367	88.791	11.0621	0.117405	1.53965	92.0405	1.8524	3.99383	13.6689	25.457	1.58353	22.0617	0.311184	22.8911	2.58552	51.89	1.42352	3.77672	0.194988	12.591	2.62201	39.0484	3.12351	0.200524	1.66484	48.6123	51.5819	1.45491	14.8004	8.47173	0.676038	11.8742	64.5435	0.235435	1.60615	11.6693	8.2885	0.27367	26.4159	1.93498	20.1659	23.8424	0.318124	0.725944	2.60808	42.1185	0.872726	25.5713
k22	0.173127	0.0289355	0.660572	0.117375	0.12302	0.154491	0.353701	0.132075	0.046647	0.135352	0.287767	0.0371693	0.293046	0.101634	0.383885	0.0635468	0.389063	0.522884	0.125469	0.90033	0.0231982	0.01349	0.559459	0.241399	0.42936	0.57641	0.511022	0.163062	0.0377987	0.127089	0.930628	0.0462459	0.421967	0.395841	0.304582	0.0537934	0.960394	0.185768	0.0107214	0.0842597	0.0152234	0.0319782	0.658132	0.1716	0.259719	0.031059	0.0288969	0.017613	0.0278626
k23	0.0751757	0.099516	0.0241494	0.0146564	0.399853	1.19229	0.880714	0.0399849	0.0604802	0.144537	0.0446872	0.826795	1.60182	0.104924	1.79438	0.0239559	0.0120539	0.250214	0.864235	0.233603	0.531658	1.09647	0.94658	1.56546	3.95765	0.183579	1.159	1.07193	0.0131262	0.634545	0.0346603	0.0820747	0.596198	0.0312387	0.457601	0.135216	4.83536	0.894147	4.0005	1.26262	1.7889	3.37391	2.09827	0.0359834	0.435397	5	0.0210399	0.0139356	0.343808
k24	0.0391413	0.457675	0.0153782	0.0147835	0.00237731	0.164545	0.023094	0.0880234	0.00963496	0.297808	0.00317137	0.788855	0.0068888	0.00644867	0.661613	0.0301768	0.0605346	0.00785798	0.104771	0.100755	0.0158462	0.0415208	0.0691273	0.313505	0.0394674	0.00330781	0.00211826	0.939818	0.00182031	0.0161746	0.280533	0.040915	0.00657674	0.284358	0.0013666	0.7324	1	0.160211	0.0479691	0.0404876	0.113849	0.0160619	0.138688	0.026106	0.00869946	0.00688373	0.0663371	0.309469	0.0249129
k25	0.0660117	0.981112	0.0542363	0.0635222	0.0313969	2.948	0.178982	0.0397769	0.0747548	0.485203	0.0416915	0.143116	0.595765	0.0105645	2.14024	0.617435	0.0415235	0.698257	1.07309	0.108043	0.3308	1.1071	0.454668	1.30884	0.101509	0.1416	0.0528851	0.836467	0.837489	0.215903	2.23655	3.2953	0.0115451	2.26812	0.431116	0.12707	5	2.18058	1.21069	0.144003	0.0875873	0.0206981	0.305555	2.63033	0.0998711	3.62293	0.0675775	0.990186	0.129457
k26	0.1452	4.68347	0.347117	0.423266	3.95953	6.75869	0.404469	0.947665	3.91362	0.201731	0.182188	0.14161	0.353904	0.5164	31.062	14.8513	0.163671	0.187841	1.13458	22.4062	19.7854	1.00562	3.01438	8.00865	0.249762	0.494938	2.66731	0.113309	0.303374	2.79075	0.110731	0.450537	0.908826	0.701267	0.493686	0.113954	0.510667	1.43261	0.1	0.262379	0.17592	14.0029	1.70111	6.76496	0.351532	9.77643	0.569597	0.849319	0.102723
k27	0.473124	0.394551	0.342669	0.141322	0.263218	0.216978	0.288866	0.324931	0.591644	0.270473	0.443911	0.38492	0.677022	0.153639	0.131131	0.523489	0.669011	0.123175	0.450988	0.124099	0.162806	0.1301	0.402122	0.858661	0.612012	0.194999	0.325826	0.252673	0.70768	0.439263	0.471833	0.579824	0.42755	0.123966	0.182276	0.126674	0.788657	0.251371	0.533617	0.277581	0.390392	0.519531	0.131084	0.157585	0.133354	0.255003	0.522768	0.377415	0.811116
k28	12.6295	19.6029	8.83892	23.6074	14.2742	9.85085	16.4765	7.29766	10.5785	7.57774	8.10851	18.7696	8.00037	18.1248	18.1788	11.4438	7.22029	14.7526	19.8913	12.5652	13.7368	11.7967	12.9935	7.04249	11.188	15.7134	13.0856	18.1238	16.327	20.5938	15.828	13.3217	20.3702	15.0529	14.3062	14.9003	24.5909	16.2349	11.7008	16.4382	16.284	14.3121	14.492	11.9595	14.1397	21.887	17.1813	20.2958	23.3767
k29	0.00601669	0.00142681	0.00255946	0.00215285	0.00528075	0.00589992	0.00577177	0.00639133	0.00487933	0.00454915	0.00123638	0.00969372	0.00295718	0.00111918	0.00113004	0.00315945	0.00735438	0.00869668	0.00720096	0.00539933	0.00108295	0.00553796	0.00335146	0.00107623	0.00242376	0.00352618	0.0015676	0.00212345	0.00660338	0.0061745	0.00495063	0.00522431	0.00582373	0.00170672	0.0041514	0.00368157	0.00898201	0.00381038	0.00264542	0.00329645	0.00128067	0.00321712	0.00267844	0.00105675	0.00119094	0.01	0.0023684	0.00825664	0.00478958
k30	16.5655	31.6588	18.351	14.9215	44.024	23.3287	23.908	22.9098	28.9939	11.7262	32.9893	33.8654	12.5288	41.5057	23.7231	44.9785	10.2339	22.45	18.1415	36.4148	15.6455	18.9596	14.3742	21.0924	45	22.4983	27.5803	13.766	10.9514	28.1197	33.5387	17.5133	31.9458	12.5032	27.0334	43.5416	17.7243	25.9171	36.6434	30.7009	29.1576	20.6243	23.6528	22.1262	27.4801	22.3328	36.6142	14.7071	14.5709
k31	3.99154	3.78727	4.78763	4.63283	4.75336	2.8436	2.88758	13.8342	8.50491	11.6586	2.36479	6.55738	9.84402	2.36258	14.5181	11.6541	2.66972	5.86018	15.5916	9.09955	4.54436	4.0442	11.4039	5.21692	12.5707	3.36167	2.16029	12.8268	5.13217	6.85148	6.38055	7.12091	4.58033	3.04656	8.06023	3.77988	17.9471	10.2677	2.63759	3.24983	4.54105	2.54938	9.49051	9.20203	7.37932	10.1281	7.63683	10.5453	7.73068
k32	7.13008	13.456	4.22358	7.91983	4.25504	12.8581	14.8284	8.86217	8.61414	4	5.40823	4.0064	4.91359	14.3254	4.0031	10.5108	5.81214	4	6.61884	6.31868	8.54908	4.3715	4.21967	15.3522	6.52119	4.7458	11.1746	13.4076	8.40538	6.11617	5.72574	9.10428	6.70523	4.30182	10.5182	14.623	7.13884	7.43165	5.27442	7.78333	8.18859	8.53467	9.27093	4.89598	4.55959	16.5834	7.57077	6.7454	4
k33	0.00926657	0.00110175	0.00626773	6.9737e-05	0.000247107	0.0195317	0.0420169	1.22046	1.34561	0.00271689	0.000993793	4.01503	0.00437818	0.00218849	0.304059	0.00172384	0.16371	2.10421	5.81228	1.01616e-05	0.0022956	1.45431	0.105487	2.44399	0.0690168	0.0238789	0.335982	2.74974	0.281219	0.0372314	0.563271	7.10019	0.000167702	1.45859	0.178102	0.054589	8.07107	2.77612	0.00052105	0.000205745	2.85001	0.0403361	0.982744	4.21367	0.00455892	10	0.00147196	2.08421	4.91565e-05
k34	0.00011113	6.31293e-05	0.0167451	2.78287	0.000162597	6.07705	1.14469	0.000227601	0.000280748	0.082615	0.000323363	6.77604	0.00106065	0.330367	0.0325642	0.0571255	1.86513e-05	1.21922	7.09523	0.00818482	2.58895e-05	0.0146015	0.345247	9.65858e-05	3.17388e-05	0.00109693	0.106858	0.0137484	0.000545514	0.280324	0.00168267	0.00279801	0.00358609	0.052278	0.153079	0.013688	7.39992	0.054773	0.00113341	8.88236e-05	0.1565	0.593152	0.0177005	2.13869e-05	0.000329752	1.14875e-05	0.0288747	4.18765e-05	0.000524766
k35	0.146177	0.0281421	0.000561003	0.165183	0.0396165	0.00158973	0.108666	0.0028958	1.61582e-05	0.203299	0.535195	0.000107809	4.74424	0.613044	0.000736187	0.000380979	0.0257617	8.4247	0.40665	10	1.03152	0.00291992	0.0141675	0.0167231	0.00779864	0.0267248	0.0733269	5.0677e-05	2.43108	2.75175	0.0375926	0.278729	0.000668208	0.0014895	0.0410163	1.13615	7.69951	0.000795152	0.056397	0.000189395	0.00822669	0.0389835	0.17557	7.9679e-05	0.00010335	1.34253	0.0111721	0.0256428	4.02013e-05
k36	0.00629752	0.0710485	0.25259	0.000782528	2.1268	0.0238376	0.00253031	0.00042262	0.21924	0.0148123	0.13962	4.81621e-05	0.0268045	0.00800295	0.0256449	0.00183799	0.0530971	0.734318	0.305183	0.000417598	0.205674	0.116495	0.200711	0.0101605	0.00352438	0.147582	0.318978	3.79086e-05	0.0102902	0.139581	1.41922e-05	0.0916731	1.23401	0.175243	0.00030281	0.600311	2.85746	0.00221964	0.000201988	0.00426419	4.68331	0.00394193	0.598897	0.00110745	0.000242113	0.435133	0.105952	0.147939	0.000601518
k37	1.06881	5.67668e-05	0.00617886	0.0433026	0.0917886	0.00803873	0.000399039	1.1553	6.56656	0.000628905	0.025541	0.00412485	3.0813	0.00113147	0.276256	0.00123913	1.17865e-05	0.000110479	0.000285106	0.00112549	0.00485463	0.336136	0.149453	1.90445	0.645494	0.0403317	0.0194311	4.24408e-05	5.00688e-05	0.0166869	0.256054	0.00823596	0.0154879	4.31937e-05	0.0284164	0.229982	6.01501	0.107028	1.56621e-05	2.25832e-05	0.18769	9.68187e-05	0.00215068	3.76145	0.0116632	1e-05	3.01342e-05	0.068539	1.01475
k38	0.0292656	0.0431669	0.019798	7.65313	0.0041546	0.0303227	0.00892144	4.54517e-05	0.199125	0.00299077	0.586162	0.00185384	5.07613e-05	0.175484	0.0365863	0.000204977	0.251493	0.164812	1.17428	1.35658e-05	1.05306	0.000141555	0.294269	0.170269	0.082881	6.29169e-05	0.000220803	0.531236	0.815215	0.733726	0.360628	0.00123935	5.20467	0.0335039	0.0196458	0.68957	7.2632	1.75354	0.0152305	0.000165065	0.312125	0.284995	0.019093	0.008573	0.0859807	1.19196e-05	0.00046658	4.80165e-05	0.203138
k39	1.16376	0.00175853	0.00332166	2.69265	0.124892	0.0139979	0.0703828	2.82467e-05	0.120481	0.0291208	0.00126658	0.0301795	1.79092	0.00712122	0.00211914	0.166132	1.43169	0.110357	0.0168734	3.69993e-05	0.0218853	0.000593958	0.582862	7.18872e-05	6.18095e-05	1.22461	0.000716045	0.00657985	0.555913	8.04701e-05	0.00012775	0.00114595	0.0802834	0.00498922	0.00022286	0.159686	7.87146	1.58691	1.92452	0.0802873	0.00763617	2.69511e-05	0.062879	0.000157257	0.0413127	10	0.0102179	0.0153406	2.6385e-05
k40	0.0509491	3.03561e-05	9.10795e-05	0.00134258	1.63487	0.00631369	0.000306145	0.00811345	0.201249	4.32226	0.399582	0.0303613	0.0561634	0.0373504	0.00213671	0.235851	0.000702473	0.000978923	0.000163086	0.00638584	0.248439	0.00229185	0.0104539	0.0358825	2.01397	0.781553	0.618139	0.893482	0.000307454	0.000730365	0.138143	0.000286561	0.334228	0.000108016	0.0704817	4.45554	8.19291	0.630162	0.0270981	0.00226497	0.0709033	0.116058	0.000376109	0.486707	0.00228467	1.24094e-05	0.00170732	0.0830526	1.77206
k41	0.278805	0.000559317	0.167057	0.00164558	0.000174267	1.22844	1.597	0.0147831	3.26966	0.0411206	0.106761	6.31947	0.000721048	5.7436	7.24993	1.43251	1.23188e-05	2.54234	0.000711056	0.184653	0.251364	0.000365574	0.014618	0.0263175	0.627445	0.00502115	0.000199887	0.0521182	7.90838	0.000121083	0.208459	0.122847	0.0150357	0.000979121	0.00805903	0.0981534	9.99978	0.000263337	0.0111891	4.68144e-05	3.08663	2.16502e-05	0.00146153	0.000249288	0.000266655	4.4602	0.00544027	3.22245	0.0175623
k42	0.0253649	0.0142466	0.00532151	0.00672957	0.00165472	0.0114411	0.0289261	0.0323726	0.0372484	0.00150858	0.0458637	0.0148941	0.0048208	0.00166722	0.0147201	0.00541264	0.00449194	0.00791595	0.0370191	0.0338387	0.00992011	0.0111404	0.00322705	0.00100915	0.00239004	0.042066	0.00530429	0.0139819	0.0179411	0.00310285	0.00511516	0.0835952	0.0236735	0.0201296	0.00744486	0.00254948	0.00695256	0.00511254	0.0217252	0.00375604	0.0326926	0.0342541	0.0028148	0.00776175	0.00908379	0.00167657	0.00630895	0.00947268	0.0106911
k43	3.68998	5.59958	1.42158	0.218134	0.00216523	1.50476	0.0319159	0.00215981	0.00291119	0.00436302	0.203196	0.0185197	1.00058	0.0155858	0.0107725	0.960052	0.27831	5.07007	0.313756	0.00310092	0.161959	0.561739	0.343816	3.86526	0.0202092	2.23791	0.0742494	0.00421243	0.00115568	0.0211951	0.203715	2.85259	0.0395374	0.00352161	0.147754	1.93304	10	0.00389687	0.0207196	0.219087	0.00274709	0.00144196	0.0492043	5.8995	0.0360552	0.00115405	0.653943	0.0187707	0.0725369
k44	27.5668	10.2879	12.6056	20.3447	37.1615	29.4151	28.4447	17.0867	21.9973	39.8954	18.5547	35.4792	28.0983	18.7292	11.8963	13.2441	14.7024	9.30405	10.3862	14.3569	16.0571	24.1956	28.0585	7.94763	8.72477	12.3927	23.4613	15.6553	15.131	16.7369	7.77752	8.11531	29.4805	8.29496	9.11874	38.0105	15.7742	11.8025	11.9497	29.1162	22.2023	31.0135	16.2249	11.2321	14.5526	11.6171	24.942	14.6774	7.54195
k45	0.216599	0.0563947	0.0888568	3.67955	5.38857	1.28662	0.00788173	0.67636	0.289962	0.0518955	0.602435	0.395563	0.00383437	0.145048	0.0270807	0.091673	0.0296842	0.0137309	5.06508	0.011931	0.00804646	0.506525	0.98516	0.00274692	0.0880258	0.366101	0.654728	0.0615699	0.00123262	0.128436	0.00352346	0.0224967	0.181042	0.0261404	0.00905513	0.00164998	9.99892	0.0274226	0.00925371	0.0516922	0.00699074	0.00151458	1.52274	1.11197	0.0836336	0.0403813	0.145549	0.0258609	4.93005
k46	7.99621	11.407	4.04163	19.0086	4.28521	3.52845	2.68914	9.37975	7.13873	11.3358	6.47627	9.88822	7.69432	3.37384	19.4722	2.69522	2.38325	2.98883	8.52138	7.56494	8.12166	18.1216	2.50736	2.2684	7.53969	8.85812	5.62373	2.55826	6.07294	3.80526	3.97179	11.2095	4.43025	17.9446	9.253	3.80345	4.83935	6.54631	14.3425	11.8215	10.2832	13.0489	5.81679	17.9819	6.60395	9.08729	11.1069	6.56981	8.75091
k47	2.80196	0.0018454	0.800234	1.55496	0.0021879	0.0668712	0.030671	0.875424	0.99159	0.0244945	0.990901	0.351077	0.0249567	0.190851	0.848353	0.0357541	0.00284443	0.0406466	0.271602	3.30952	2.35067	0.160943	2.37062	0.0740451	0.0539358	0.208769	0.908665	0.00214118	0.0970917	0.0334174	0.101087	0.469028	0.00768021	0.0723149	0.043474	0.0297269	10	0.00905959	0.117067	0.0275493	1.97718	0.0103496	3.6984	0.0320543	0.275054	3.77521	0.402749	0.664907	0.173077
k48	21.9114	48.772	13.1359	25.8754	48.5655	49.9233	10.5049	23.1825	15.1123	30.4008	7.85818	10.517	5.84865	36.3122	5.87288	39.5576	6.62873	12.2959	35.732	21.1485	13.6115	7.18061	28.2132	7.25714	36.2975	20.0529	16.3338	15.2176	8.86056	15.4196	15.4448	35.9791	18.6074	43.3516	21.2023	48.8425	30.2539	16.301	21.9023	16.423	22.6533	21.6747	36.0647	16.7234	13.2595	32.0273	43.2486	28.4731	45.0714
k49	0.00337938	0.0120405	0.00418005	0.00273327	0.0243465	0.010202	0.00540118	0.0626848	0.00189576	0.171789	0.0103403	0.403864	0.00484336	0.445417	0.0337109	0.0097498	0.023362	0.0388454	0.0338342	0.0119068	0.00328939	0.0498654	0.0423948	0.530767	4.4132	0.333403	0.0214761	0.00382037	0.00184663	0.803653	0.0769856	0.00120046	0.010937	0.043468	0.0382705	0.033081	10	4.29375	0.01061	0.00765678	0.00523916	0.00243846	0.0117682	4.13224	1.19305	2.435	0.0649226	0.00454165	0.0390335
k50	5.76026	1.00001	4.89011	1.42087	8.26243	2.83142	4.14318	2.17913	4.07638	16	8.15671	1.99423	8.26509	2.69636	15.2121	3.14962	6.23974	1.10421	7.25002	1.02156	3.53655	8.22934	2.0769	5.71842	1.87143	14.6107	2.16382	14.2773	7.77355	1.99821	1.60002	3.50383	4.2506	15.7435	4.57786	15.4173	2.55858	5.4991	7.29556	1.59763	7.16155	2.74853	3.68318	2.43689	5.85415	9.6946	13.0152	6.42863	1.04101
k51	7.11868	42.2116	13.0545	19.5969	71.7051	60.5851	66.3778	69.7269	18.6262	59.5326	17.8284	15.8928	74.2883	73.678	71.5258	20.3151	14.4533	4.72062	4	31.9927	24.8318	30.1996	40.9978	67.504	74.8184	39.8027	19.4994	10.7036	19.1092	21.5038	18.4069	5.2876	49.4312	71.014	28.5465	38.4262	10.7412	13.0986	29.1712	44.8208	16.3094	14.9839	60.1906	46.7796	60.523	28.9718	30.9768	53.0813	69.3396
k52	15	15	15	15	15	15	15	15	15	15	15	15	15	15	15	15	15	15	15	15	15	15	15	15	15	15	15	15	15	15	15	15	15	15	15	15	15	15	15	15	15	15	15	15	15	15	15	15	15
k53	9.63377	73.2341	28.1744	30.2276	10.8376	33.0563	33.3166	15.3276	46.647	4.92381	43.0195	12.7097	25.485	22.7897	71.8669	42.8464	29.4098	4.88404	74.6795	50.5923	22.9057	46.9685	5.60155	17.8391	18.0879	14.4228	25.0202	4.41304	19.0621	14.838	33.5651	16.7503	64.9988	69.0152	21.1897	73.4812	24.0052	21.2041	6.01696	13.4507	10.4112	20.3603	18.1055	8.75644	52.8213	64.9392	27.7219	11.0763	16.2726
k54	0.0544628	0.321566	0.0755982	5.20307	0.176397	0.180251	2.19472	0.28918	0.102462	31.465	2.47386	0.531681	0.42816	0.101541	0.353188	0.474693	0.611315	0.0425632	0.0411774	0.0729771	0.044697	2.81777	0.0346972	0.053854	0.42999	0.0849665	0.26589	0.0426686	0.115484	0.264061	0.0417305	0.0515388	0.842541	6.01204	0.209913	0.670945	0.0635572	0.042513	0.22657	0.716757	0.429373	0.144678	0.19327	0.134626	2.17935	1.39455	0.501907	0.108447	32.7354
k55	1.54089	0.133375	3.56991	5.12064	68.4665	0.253756	1.55553	7.39196	0.153416	8.8158	0.379138	0.854899	81.9291	0.105032	21.6331	0.485826	0.109039	0.528851	0.904167	13.4569	1.27935	5.59297	0.61972	5.40512	0.407542	0.672339	1.60862	3.50029	8.71311	2.40209	2.7008	0.129761	60.489	0.144835	11.4083	18.7887	8.11036	5.29366	1.98577	21.5171	4.4211	0.519743	3.28224	14.5014	65.4637	22.437	97.7795	0.39682	0.362809
k56	9.22043	8.55456	4.4585	72.0472	68.2177	2.6559	39.0074	1.91175	8.99184	52.5187	16.0987	12.088	18.8171	1.09056	13.608	4.96224	0.904777	2.65934	7.28773	59.5541	3.72847	2.216	5.07979	1.64168	1.07275	0.588369	1.76985	25.832	5.11689	19.3006	67.8527	4.01505	40.225	1.51646	19.3214	13.2807	23.8657	11.1614	1.89767	27.9848	26.3241	5.29963	9.74534	5.60359	23.4026	48.1713	30.9878	0.64639	1.23897
k57	50.6616	50.7478	31.7939	60.3564	46.7559	61.8018	34.1859	24.0827	50.0526	46.9173	73.2734	30.2656	21.4417	72.2897	66.0446	30.0187	34.7445	67.286	50.203	28.997	61.0159	38.6872	23.3107	50.2141	20.0628	51.3986	51.1448	26.9891	30.1904	58.4814	51.9292	29.5604	42.9104	27.6868	38.396	88.3172	35.7294	39.7622	23.6031	41.1537	52.2082	87.6564	32.407	23.3464	24.6989	51.5785	48.8059	37.2358	20.9748
k58	0.0673554	0.0444386	0.0983849	0.0254465	0.127075	0.143563	0.0178364	0.11077	0.0226004	0.0412958	0.0239347	0.019885	0.0946192	0.317966	0.22445	0.0599941	0.129447	0.116332	0.0424571	0.0305034	0.142461	0.158453	0.0451461	0.231506	0.0880964	0.238183	0.172279	0.0235963	0.113799	0.0558723	0.0172516	0.0196581	0.141852	0.111671	0.0810452	0.299309	0.0595775	0.0882738	0.0804339	0.0986337	0.0442852	0.130568	0.0642917	0.0925212	0.099007	0.0927126	0.199887	0.167697	0.0679027
k59	3.94047	4.85773	2.77836	8.83458	1.33984	1.32607	4.92877	6.09403	6.06149	4.9744	1.25955	1.19128	9.35007	3.04109	1.69508	5.77273	1.03796	3.72657	7.0298	4.75697	4.78894	2.98776	1.48696	7.40751	1.03122	8.40676	3.11226	1.90621	2.78316	6.00757	5.31638	3.86281	1.30496	8.83174	1.90752	2.45886	4.75224	2.05562	1	2.39067	5.76337	9.73987	3.2604	5.96089	8.06802	2.11289	3.35237	5.31106	4.50017
k60	8.05215	100	2.20816	2.1579	0.115615	7.88173	12.0974	23.3704	0.885019	7.25734	1.76082	0.173505	0.174276	8.51031	3.34133	0.486615	2.77515	0.964288	28.0233	14.658	12.7649	4.29519	0.412392	0.122261	0.233295	0.102524	10.9204	0.285319	2.40479	0.574409	2.4415	24.7513	1.76633	56.9948	17.8246	9.27405	88.0763	1.05684	5.64842	0.462486	9.60471	0.557061	8.34094	0.182968	0.690478	0.891092	0.777578	1.24038	0.130049
k61	19.7698	56.2613	37.0448	64.0899	31.9827	69.9814	62.9634	59.9107	29.6226	15.1968	31.2421	14.8864	66.2574	38.958	42.3689	24.4836	14.9913	23.2576	19.1656	48.4608	32.4407	20.7798	32.5486	50.5754	21.6692	36.0209	25.3913	14.9929	31.706	23.3565	69.9925	20.9903	43.8152	70.004	22.48	58.0616	45.6579	41.9113	71.0893	53.6876	35.0809	22.0518	37.9112	14	17.3744	56.5505	28.7524	29.1358	14.6829
k62	2.41622	10.1789	29.597	3.68738	0.0391349	0.513215	30.6802	0.617465	1.33128	4.55629	8.48567	0.527843	7.35391	0.103728	7.63038	0.861841	17.2967	0.474506	1.25891	0.0649961	4.19701	0.874003	13.0161	1.04117	0.0668412	0.554946	16.2041	17.194	0.484971	4.93346	2.82391	0.225346	3.95805	21.5145	0.0784783	0.535385	3.88977	2.76283	0.0912233	8.80529	0.644994	6.72196	7.94748	0.106041	0.241981	0.869359	14.0395	0.290909	8.52376
k63	0.211664	0.131765	0.00029702	0.034102	0.000860965	0.145941	0.0533494	0.443637	0.162938	0.00108073	0.000561159	0.000249423	0.013389	0.000243677	0.00416259	0.00171729	0.0063531	0.00439035	0.253902	0.00401111	0.538258	0.153586	0.00496814	0.00414793	0.00104386	0.00284734	0.0576992	0.0842423	0.00460328	0.00168144	0.151978	0.000367104	0.142963	0.256106	0.00457456	0.000194172	1	0.631133	0.142596	0.000692879	0.0160996	0.000773452	0.000971605	0.00331782	0.00338098	0.984909	0.0183906	0.115581	0.473188
k64	0.0743062	0.136357	0.0231099	0.416059	0.0543489	0.0391765	0.00139873	0.317516	0.497884	0.000639442	0.0476403	0.752816	0.00432234	0.00468301	0.0257869	0.186126	0.000864774	0.0646055	0.0122914	0.000254301	0.00232432	0.501003	0.00745738	0.000928891	0.00687251	0.0355742	0.15648	0.00704835	0.00235855	0.0888074	0.0205828	0.239391	0.00729103	0.0264314	0.00657906	0.00419565	1	0.0746653	0.00364417	0.000236005	0.00147057	0.00352236	0.0300946	0.183174	0.0955632	0.000852674	0.0509531	0.028043	0.000187817
k65	0.00133447	0.000473925	0.000244875	0.00168826	0.00282061	0.0001	0.00176765	0.0543179	0.0432563	0.0112512	0.0216097	0.256273	0.032434	0.000620477	0.00272044	0.348866	0.0387536	0.00290406	0.34219	0.0263304	0.0348139	0.000336071	0.079517	0.92104	0.00439136	0.0144493	0.000239358	0.00377346	0.00791381	0.000511206	0.00324319	0.00238185	0.0044609	0.00223019	0.00343835	0.000221932	0.477334	0.000573113	0.0639516	0.223023	0.00345378	0.0415792	0.000928727	0.824232	0.00064682	0.00203584	0.000368008	0.00611145	0.0121502
k66	0.028914	0.376862	0.0194841	0.0575991	1.07354	0.133921	0.113014	1.81905	0.407931	1.17103	0.7744	0.0557655	0.333874	0.420329	0.438526	0.00664434	5.12483	0.00300487	1.96784	6.11024	0.0107806	0.0378175	0.00985453	0.0113513	0.0332096	1.81562	0.0194621	0.0962892	4.90153	0.237683	0.103737	0.00492081	0.25135	0.0253089	0.13513	0.00291694	0.0167236	0.0170974	4.22899	2.72875	1.4789	0.130273	0.0724106	0.00800582	0.0764203	0.00115478	0.392607	0.595588	0.249995
k67	0.1452	4.68347	0.347117	0.423266	3.95953	6.75869	0.404469	0.947665	3.91362	0.201731	0.182188	0.14161	0.353904	0.5164	31.062	14.8513	0.163671	0.187841	1.13458	22.4062	19.7854	1.00562	3.01438	8.00865	0.249762	0.494938	2.66731	0.113309	0.303374	2.79075	0.110731	0.450537	0.908826	0.701267	0.493686	0.113954	0.510667	1.43261	0.1	0.262379	0.17592	14.0029	1.70111	6.76496	0.351532	9.77643	0.569597	0.849319	0.102723
k68	0.00431331	0.00562226	0.00474831	1.16944	0.00250708	0.0951796	0.0849272	0.00945349	0.521726	0.00653268	0.183308	0.00540053	0.0139887	0.0921512	0.00443402	0.405847	0.00768647	0.00149167	3.59886	0.751785	0.276855	0.0339936	0.01012	0.00476841	0.00944933	0.0207914	0.00472705	0.00907887	1.56595	0.00175817	4.62963	0.00466716	0.00624188	0.573214	0.0763301	0.0571411	0.321318	0.010835	0.00570919	0.0106178	0.142998	0.00311212	0.276305	0.0241236	0.00450647	0.0125466	0.325653	0.119714	0.0852434
k69	12.6295	19.6029	8.83892	23.6074	14.2742	9.85085	16.4765	7.29766	10.5785	7.57774	8.10851	18.7696	8.00037	18.1248	18.1788	11.4438	7.22029	14.7526	19.8913	12.5652	13.7368	11.7967	12.9935	7.04249	11.188	15.7134	13.0856	18.1238	16.327	20.5938	15.828	13.3217	20.3702	15.0529	14.3062	14.9003	24.5909	16.2349	11.7008	16.4382	16.284	14.3121	14.492	11.9595	14.1397	21.887	17.1813	20.2958	23.3767
k70	0.0730552	0.457706	0.00938761	0.900928	0.0727394	1.42623	0.223555	0.615273	0.929019	7.54371	0.629804	1.27898	0.0884727	0.0617758	2.27515	1.18476	0.18847	0.0856314	6.90221	0.245783	0.0666307	0.263215	1.09713	0.11171	1.28735	0.00871649	0.246038	1.6038	0.291943	1.76283	5.69278	1.71073	0.395114	0.153462	0.215426	0.590891	0.387416	3.4015	3.59556	4.52274	0.22063	1.80999	0.201193	0.698689	2.89078	4.14143	0.156481	0.0403293	0.210635
k71	16.5655	31.6588	18.351	14.9215	44.024	23.3287	23.908	22.9098	28.9939	11.7262	32.9893	33.8654	12.5288	41.5057	23.7231	44.9785	10.2339	22.45	18.1415	36.4148	15.6455	18.9596	14.3742	21.0924	45	22.4983	27.5803	13.766	10.9514	28.1197	33.5387	17.5133	31.9458	12.5032	27.0334	43.5416	17.7243	25.9171	36.6434	30.7009	29.1576	20.6243	23.6528	22.1262	27.4801	22.3328	36.6142	14.7071	14.5709
k72	0.0143521	0.049826	0.00725454	2.58777	0.00420288	0.0733551	0.00688252	0.0139749	0.00138175	1.44174	0.0084448	0.0733554	0.0150586	0.0279755	0.0374326	0.00811499	0.0329744	0.00394312	0.0213232	0.00130775	0.0177392	0.0310563	0.0294178	0.0133108	0.00427511	0.00759359	0.00599503	1.0155	0.00217033	0.168113	0.0182984	0.00300208	0.00526014	0.00793764	0.00521365	0.0561656	2.08137	0.0135778	0.202145	0.0209869	0.0374123	0.00372276	0.0096229	1.62318	0.0217635	0.011104	0.011306	0.00448678	0.0156321
k73	7.13008	13.456	4.22358	7.91983	4.25504	12.8581	14.8284	8.86217	8.61414	4	5.40823	4.0064	4.91359	14.3254	4.0031	10.5108	5.81214	4	6.61884	6.31868	8.54908	4.3715	4.21967	15.3522	6.52119	4.7458	11.1746	13.4076	8.40538	6.11617	5.72574	9.10428	6.70523	4.30182	10.5182	14.623	7.13884	7.43165	5.27442	7.78333	8.18859	8.53467	9.27093	4.89598	4.55959	16.5834	7.57077	6.7454	4
k74	0.000160591	0.177009	0.0452628	1.00817	0.173414	0.465024	7.44206	0.00343382	0.734984	0.376689	0.00421592	7.1801	0.329609	0.0373539	0.00071446	0.0414756	2.71481	0.865773	0.00885406	2.79678	0.244919	0.159427	5.90248	0.880652	0.0258788	0.863945	0.334425	0.00367527	5.15742	0.849245	4.82865	0.000315103	0.540968	0.313098	0.360623	1.16239	2.51872	0.0208505	0.0216333	0.145026	0.00777135	1.23326	0.326884	0.995611	0.166581	8.05842	0.0021498	4.01324	0.261817
k75	8.56562e-05	0.812464	0.000164269	2.74059e-05	0.00120981	0.00157466	3.50863e-05	0.0355048	0.00128354	0.00184986	0.371449	9.26612e-05	6.43997e-05	0.000128197	0.230406	4.83194e-05	9.89022e-05	0.00013364	0.00393664	0.000604824	5.35539e-05	0.00182671	0.000279373	0.767274	0.000399274	4.57482e-05	7.29773e-05	0.02561	4.18771e-05	0.00214422	0.00938134	1.09161e-05	0.103782	2.28099	0.000175725	0.765505	2.06854	2.40633e-05	0.000610087	0.0387162	0.0117803	0.036446	0.00983901	1.30388e-05	0.00166608	1.24094e-05	6.25148e-05	0.000935359	8.30461e-05
k76	0.283991	2.60461	0.00587757	0.00123706	1.69296e-05	0.0875144	1.6857	0.000464564	0.127651	0.000274543	0.225903	0.0376117	0.0160133	2.79644e-05	1.18498e-05	0.0791693	5.43657	0.0348041	0.0070891	7.36221	0.00401154	0.172174	1.41277	0.311784	0.0477732	0.000752353	0.0177735	0.00353579	0.000216402	0.00174267	0.0935805	0.0172861	0.00108281	2.21693e-05	2.70662e-05	0.00494441	1.38059	0.238443	0.104832	0.990496	0.739685	3.44863	0.000636582	0.0220233	0.539488	1.38009e-05	0.00550014	3.59099	0.00532377
k77	1.18581	0.000279811	0.00121559	0.173047	3.49979	0.000300949	4.93256e-05	0.00110919	0.0479452	0.164439	0.000459355	4.0494e-05	7.99739e-05	1.75582	0.00051761	5.47995e-05	0.361091	0.00775637	0.0298832	0.198559	0.0132374	0.000858938	2.38078	5.48027	0.00710033	1.78085e-05	0.503513	0.0383274	0.00303111	0.00985468	0.0514998	0.00172005	0.0685652	0.00883444	1.15714	0.00208394	8.94291	4.10939e-05	0.000565972	0.0233518	4.49692	4.6574	0.00457026	0.000625792	0.000758999	0.000138545	1.67407	2.59069	0.000638426
k78	0.0045616	0.000360047	0.0043923	0.00288332	0.00631937	10	0.0166077	0.85922	0.000544232	0.0505231	0.000804557	3.78697e-05	0.0136987	0.0123405	0.000798948	0.000274581	3.40049	0.407587	3.45983	0.0612073	0.00111192	0.0313105	0.0526723	0.00116921	0.00424322	0.00219671	0.000102352	0.0600775	0.0035465	1.57684e-05	0.00256874	0.00358857	0.223676	0.000117271	0.000930554	0.00331018	6.6877	0.0467047	1.22037	0.25711	0.979773	0.00193888	0.817834	2.65996e-05	3.71334	8.05842	0.0141991	2.04684e-05	0.184628
k79	0.346673	0.00479255	0.00275639	0.0361282	0.0383533	0.123019	0.00418756	2.05298	1.17013	1.63206	1.42756	0.012073	0.576029	6.41972	1.5129	2.43901	0.0260802	0.124416	1.43493	0.225083	0.120103	0.0014326	0.0389847	0.0203855	1.33116	0.00720612	0.00824145	0.115313	0.898436	0.302205	0.000409214	2.34097	0.0525372	0.103802	0.0381879	0.0087841	6.07902	2.82583	0.418413	0.377904	0.110303	2.12399	0.0224255	1.5455e-05	0.169147	0.128377	0.529988	0.0161748	0.156594
k80	0.551509	0.0464229	0.000291952	0.0534885	2.97397	0.0136261	0.00568725	0.00375022	0.11385	3.48587	0.204941	0.00560159	0.000554933	0.137175	0.000260182	0.000130394	0.000125847	0.00171295	0.48726	0.638825	0.0627844	0.025328	0.0900114	5.07615e-05	0.00014305	0.164799	0.745718	0.0302196	0.674581	0.000385429	0.075345	0.00177076	0.00483182	0.0907299	0.000791997	0.047629	0.591817	2.70533	0.00304388	4.25407	0.00835323	0.000204339	0.000538841	0.0344297	0.00599767	8.67407	0.353755	0.0309863	0.0431284
k81	5.588e-05	0.881305	5.54541e-05	0.0154429	0.0658816	0.0743937	0.000329734	7.99259e-05	0.631828	0.00400133	0.00777893	0.0107743	0.000126046	1.29957e-05	0.000115364	3.32555e-05	0.00121218	4.66992e-05	0.594102	5.37437	0.00270658	0.000636064	0.286956	3.30623e-05	4.09065e-05	0.0151615	0.000490448	0.0571795	0.653953	0.27851	0.00278939	0.381403	0.000512783	0.000661349	0.00013165	0.00207248	4.8769	0.203136	0.00041377	0.0431613	0.00363525	4.81721e-05	0.0108076	3.8589	0.00318621	0.00703702	0.00299097	0.0169293	0.000164964
k82	0.644848	0.137131	0.00122499	0.000982932	0.0118331	0.00884992	0.000814792	0.105278	0.0144948	0.0972433	0.00390585	0.000249843	0.00717979	2.06595	2.78744	2.49893e-05	0.000294794	0.0038918	0.00567916	0.72755	0.363074	0.944875	0.00131719	0.000456119	0.849537	0.014448	0.00902407	0.846994	0.00763558	0.936883	0.555243	0.003549	0.0121123	0.000133881	0.000224164	3.45951	0.368371	8.47276e-05	0.313001	0.98181	7.88724e-05	5.87688e-05	0.100232	0.000269018	0.0424737	10	0.0138663	0.340547	0.173138
k83	0.00650215	0.000743169	0.000663581	0.00299098	0.00483464	0.0168436	0.00248391	0.00604927	0.0757939	0.129086	0.0213642	0.00239744	0.00348273	0.00533891	0.00138739	0.000471977	0.000301432	0.00540457	0.010638	0.0910977	0.0110298	0.000826984	0.00658996	0.132574	0.000744656	0.00466782	0.0045492	0.0344746	0.428393	0.000811427	0.000238708	0.00544148	0.011668	0.00531231	0.00242127	0.0037255	0.00415328	0.0312824	0.0165598	0.00322355	0.00611533	0.00102561	0.00118211	0.000277152	0.0259067	0.000245337	0.0478931	0.0101781	0.0528067
k84	0.68	0.68	0.68	0.68	0.68	0.68	0.68	0.68	0.68	0.68	0.68	0.68	0.68	0.68	0.68	0.68	0.68	0.68	0.68	0.68	0.68	0.68	0.68	0.68	0.68	0.68	0.68	0.68	0.68	0.68	0.68	0.68	0.68	0.68	0.68	0.68	0.68	0.68	0.68	0.68	0.68	0.68	0.68	0.68	0.68	0.68	0.68	0.68	0.68
k85	0.0153172	0.0866514	0.0847651	0.00196595	0.0920954	0.00930974	0.0589118	0.0106569	0.0109265	0.0420609	0.00117639	0.0030952	0.00219263	0.00105533	0.0179447	0.00394819	0.00286275	0.0331978	0.0657599	0.00144088	0.0141375	0.00685944	0.0757916	0.00113731	0.097367	0.0175154	0.0380578	0.0954016	0.1	0.0302591	0.0188285	0.00134152	0.0316529	0.0763379	0.00384225	0.00373971	0.0529196	0.00509313	0.0986351	0.0032315	0.00283818	0.0567956	0.00206681	0.0964518	0.093871	0.00838079	0.012616	0.00585799	0.0014532
k86	5e-06	5e-06	5e-06	5e-06	5e-06	5e-06	5e-06	5e-06	5e-06	5e-06	5e-06	5e-06	5e-06	5e-06	5e-06	5e-06	5e-06	5e-06	5e-06	5e-06	5e-06	5e-06	5e-06	5e-06	5e-06	5e-06	5e-06	5e-06	5e-06	5e-06	5e-06	5e-06	5e-06	5e-06	5e-06	5e-06	5e-06	5e-06	5e-06	5e-06	5e-06	5e-06	5e-06	5e-06	5e-06	5e-06	5e-06	5e-06	5e-06
k87	0.0012	0.0012	0.0012	0.0012	0.0012	0.0012	0.0012	0.0012	0.0012	0.0012	0.0012	0.0012	0.0012	0.0012	0.0012	0.0012	0.0012	0.0012	0.0012	0.0012	0.0012	0.0012	0.0012	0.0012	0.0012	0.0012	0.0012	0.0012	0.0012	0.0012	0.0012	0.0012	0.0012	0.0012	0.0012	0.0012	0.0012	0.0012	0.0012	0.0012	0.0012	0.0012	0.0012	0.0012	0.0012	0.0012	0.0012	0.0012	0.0012
k88	5e-06	5e-06	5e-06	5e-06	5e-06	5e-06	5e-06	5e-06	5e-06	5e-06	5e-06	5e-06	5e-06	5e-06	5e-06	5e-06	5e-06	5e-06	5e-06	5e-06	5e-06	5e-06	5e-06	5e-06	5e-06	5e-06	5e-06	5e-06	5e-06	5e-06	5e-06	5e-06	5e-06	5e-06	5e-06	5e-06	5e-06	5e-06	5e-06	5e-06	5e-06	5e-06	5e-06	5e-06	5e-06	5e-06	5e-06	5e-06	5e-06
k89	0.06	0.06	0.06	0.06	0.06	0.06	0.06	0.06	0.06	0.06	0.06	0.06	0.06	0.06	0.06	0.06	0.06	0.06	0.06	0.06	0.06	0.06	0.06	0.06	0.06	0.06	0.06	0.06	0.06	0.06	0.06	0.06	0.06	0.06	0.06	0.06	0.06	0.06	0.06	0.06	0.06	0.06	0.06	0.06	0.06	0.06	0.06	0.06	0.06
k90	0.095	0.095	0.095	0.095	0.095	0.095	0.095	0.095	0.095	0.095	0.095	0.095	0.095	0.095	0.095	0.095	0.095	0.095	0.095	0.095	0.095	0.095	0.095	0.095	0.095	0.095	0.095	0.095	0.095	0.095	0.095	0.095	0.095	0.095	0.095	0.095	0.095	0.095	0.095	0.095	0.095	0.095	0.095	0.095	0.095	0.095	0.095	0.095	0.095
k91	0.00542857	0.00542857	0.00542857	0.00542857	0.00542857	0.00542857	0.00542857	0.00542857	0.00542857	0.00542857	0.00542857	0.00542857	0.00542857	0.00542857	0.00542857	0.00542857	0.00542857	0.00542857	0.00542857	0.00542857	0.00542857	0.00542857	0.00542857	0.00542857	0.00542857	0.00542857	0.00542857	0.00542857	0.00542857	0.00542857	0.00542857	0.00542857	0.00542857	0.00542857	0.00542857	0.00542857	0.00542857	0.00542857	0.00542857	0.00542857	0.00542857	0.00542857	0.00542857	0.00542857	0.00542857	0.00542857	0.00542857	0.00542857	0.00542857
k92	0.095	0.095	0.095	0.095	0.095	0.095	0.095	0.095	0.095	0.095	0.095	0.095	0.095	0.095	0.095	0.095	0.095	0.095	0.095	0.095	0.095	0.095	0.095	0.095	0.095	0.095	0.095	0.095	0.095	0.095	0.095	0.095	0.095	0.095	0.095	0.095	0.095	0.095	0.095	0.095	0.095	0.095	0.095	0.095	0.095	0.095	0.095	0.095	0.095
k93	0.019	0.019	0.019	0.019	0.019	0.019	0.019	0.019	0.019	0.019	0.019	0.019	0.019	0.019	0.019	0.019	0.019	0.019	0.019	0.019	0.019	0.019	0.019	0.019	0.019	0.019	0.019	0.019	0.019	0.019	0.019	0.019	0.019	0.019	0.019	0.019	0.019	0.019	0.019	0.019	0.019	0.019	0.019	0.019	0.019	0.019	0.019	0.019	0.019
[truncated: 2,451 more columns]
